# Supplementary material for: The Changing Burden of Neonatal Disorders in China from 1990 to 2021: A Longitudinal Analysis of Mortality, Disability, and Attributable Risk Factors
Source: Research Square preprint supplement (doi:10.21203/rs.3.rs-7286059/v1), 2025-09-12
Supplement: Supplementary file 1 [file 26614b6c166fc6800cad83f9.docx]

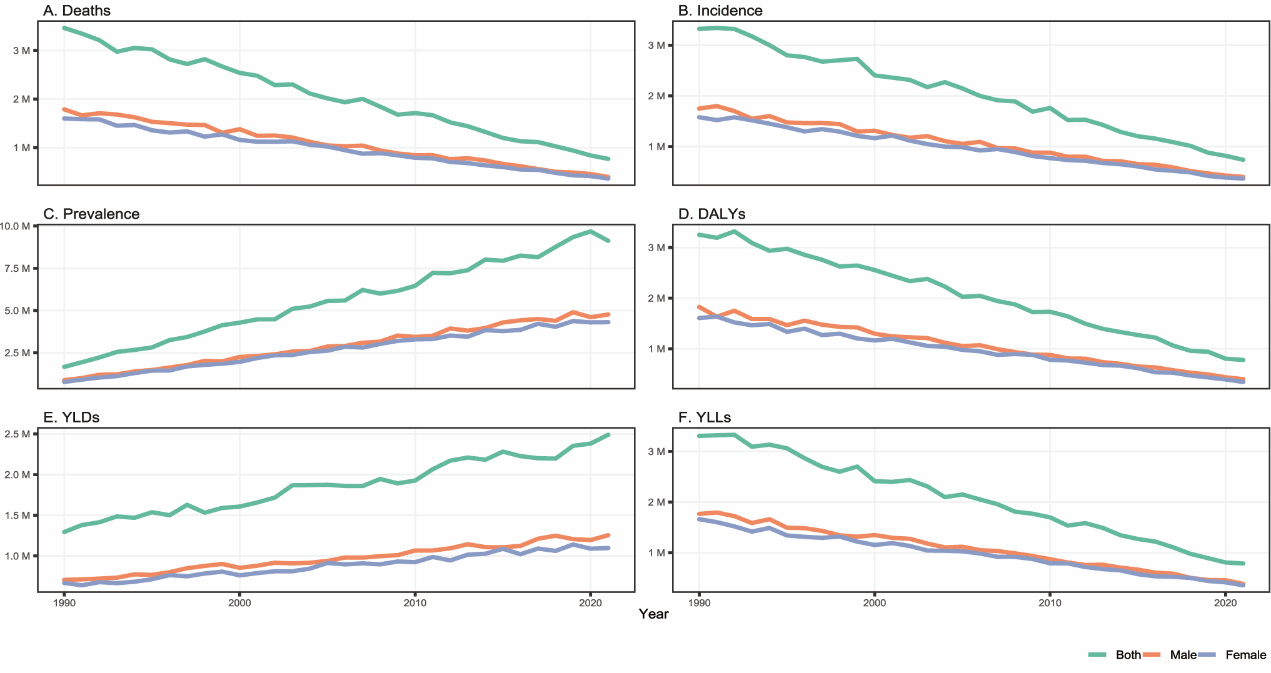


Figure S1 The trend of all-age number of all six measures for neonatal encephalopathy due to birth asphyxia and trauma in China from 1990 to 2021


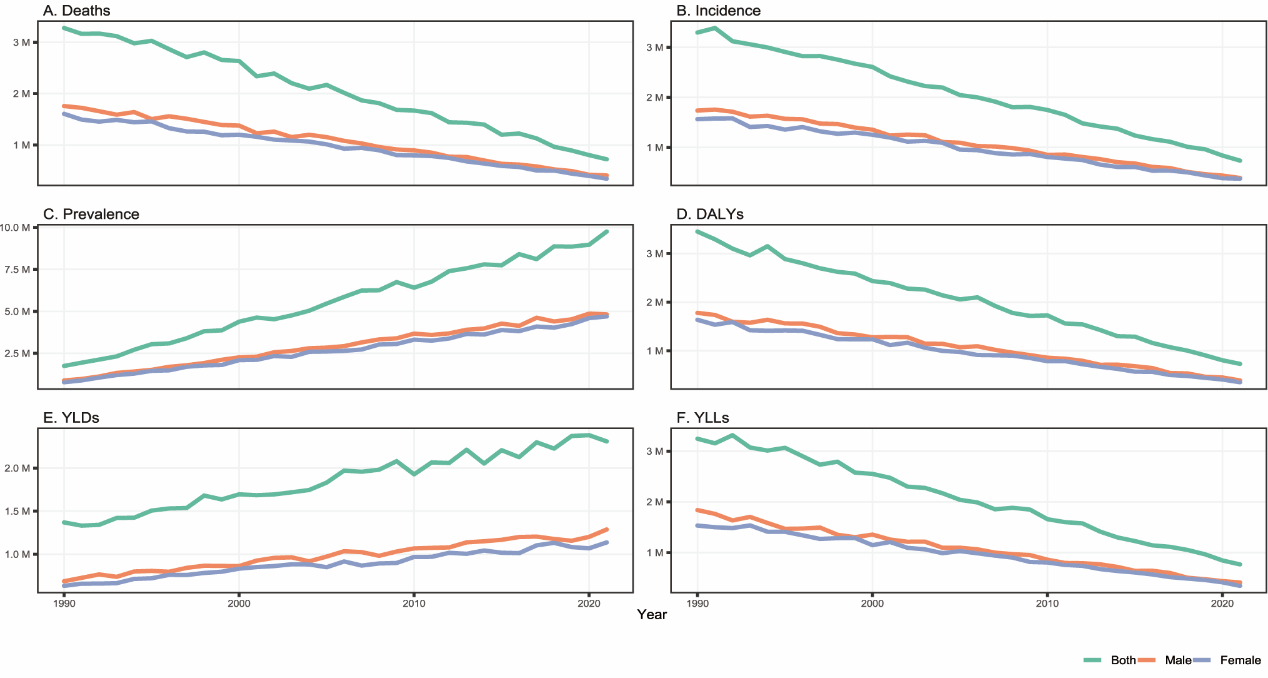


Figure S2 The trend of all-age number of all six measures for hemolytic disease and other neonatal jaundice in China from 1990 to 2021


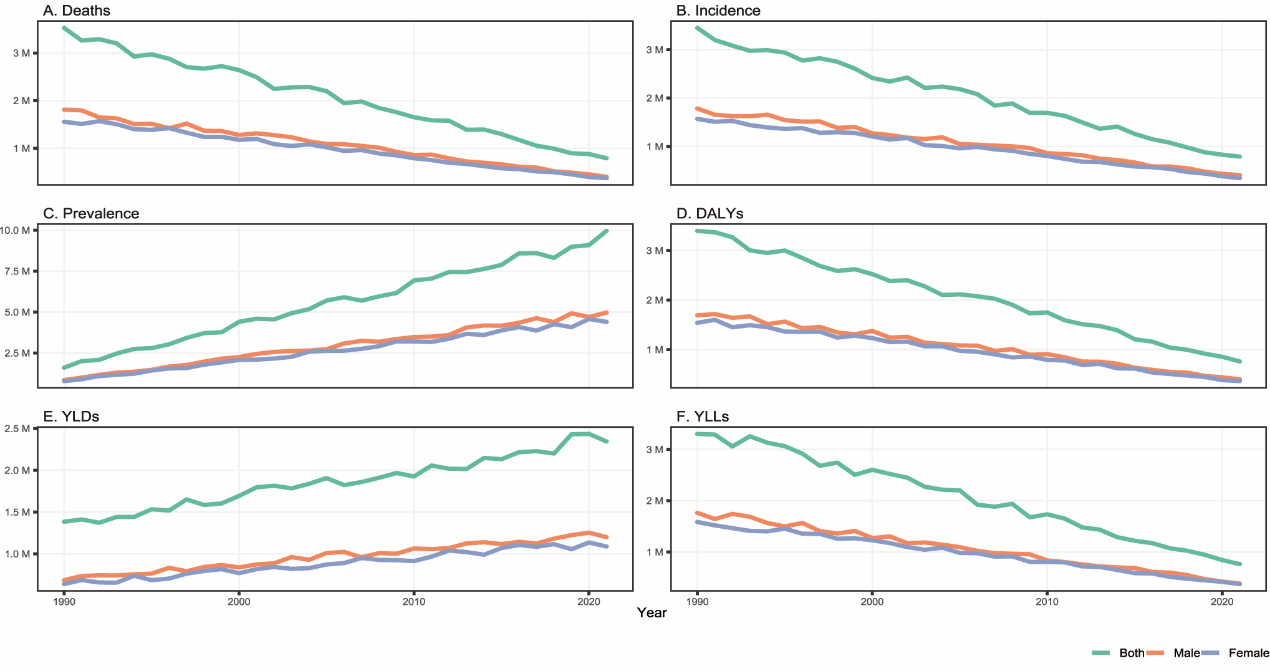


Figure S3 The trend of all-age number of all six measures for neonatal preterm birth in China from 1990 to 2021


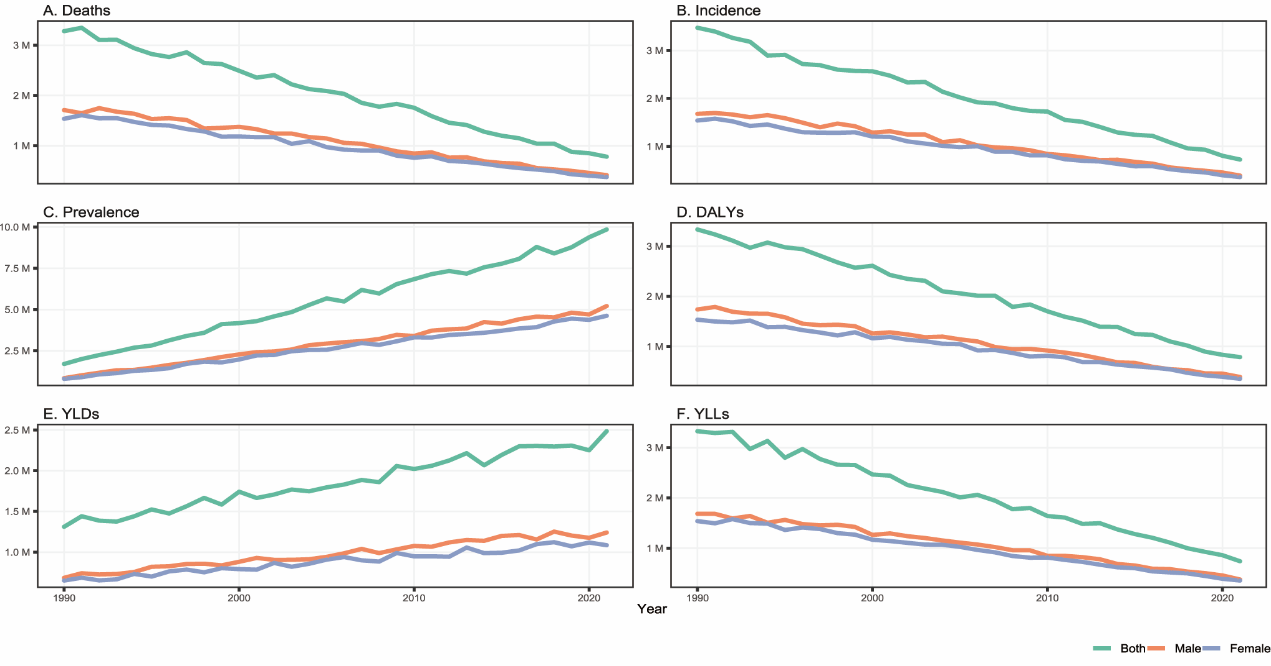


Figure S4 The trend of all-age number of all six measures for neonatal sepsis and other neonatal infections in China from 1990 to 2021


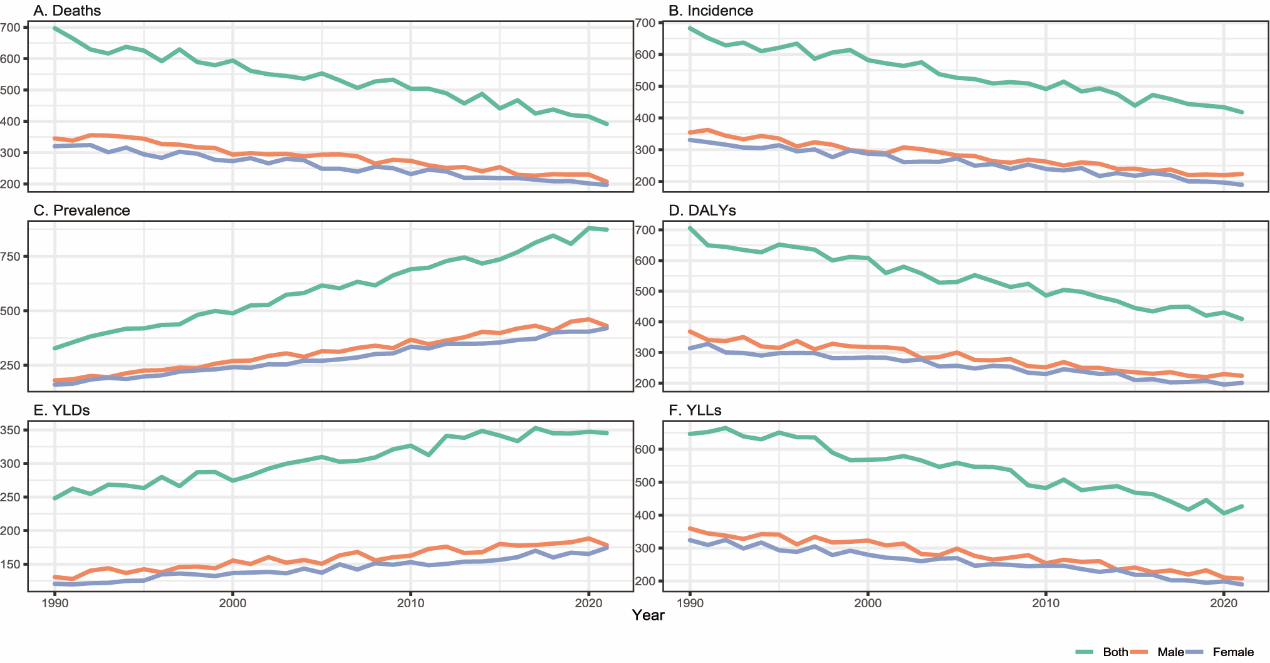


Figure S5 The trend of age-standardized rate of all six measures for neonatal encephalopathy due to birth asphyxia and trauma in China from 1990 to 2021


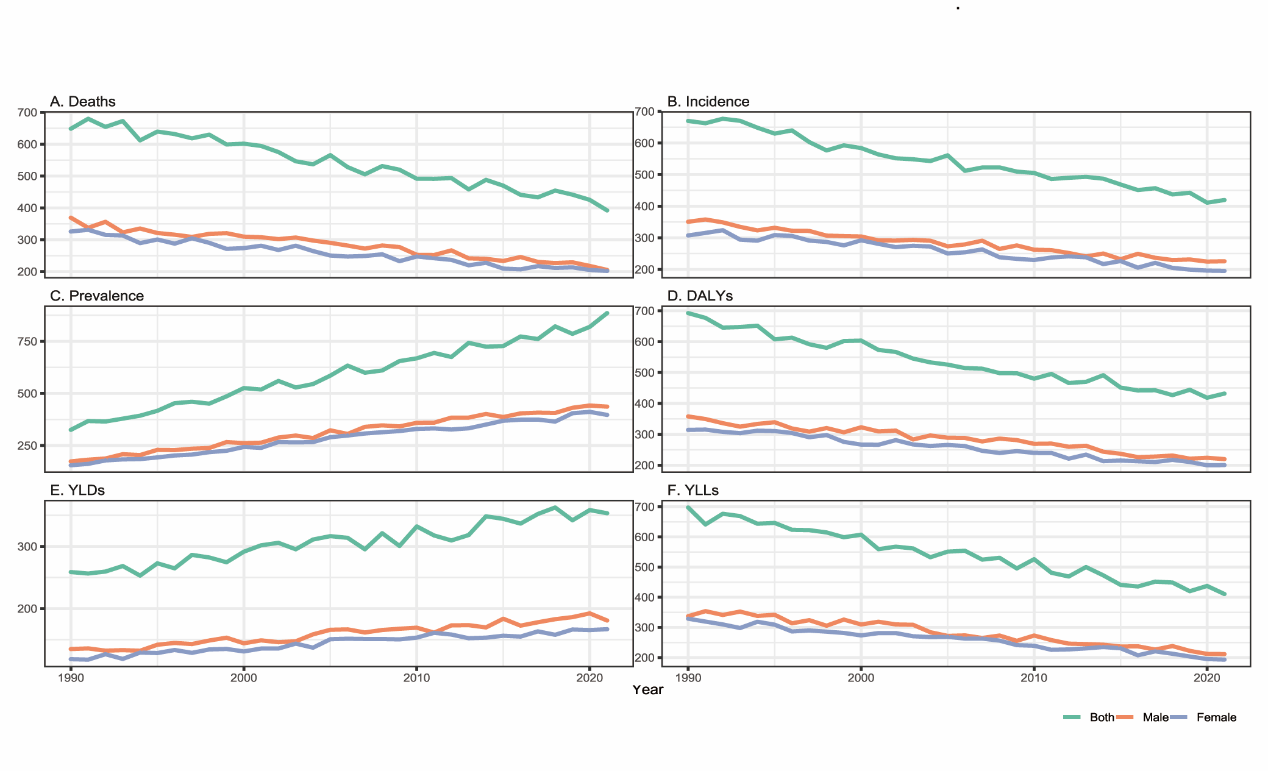


Figure S6 The trend of age-standardized rate of all six measures for hemolytic disease and other neonatal jaundice in China from 1990 to 2021


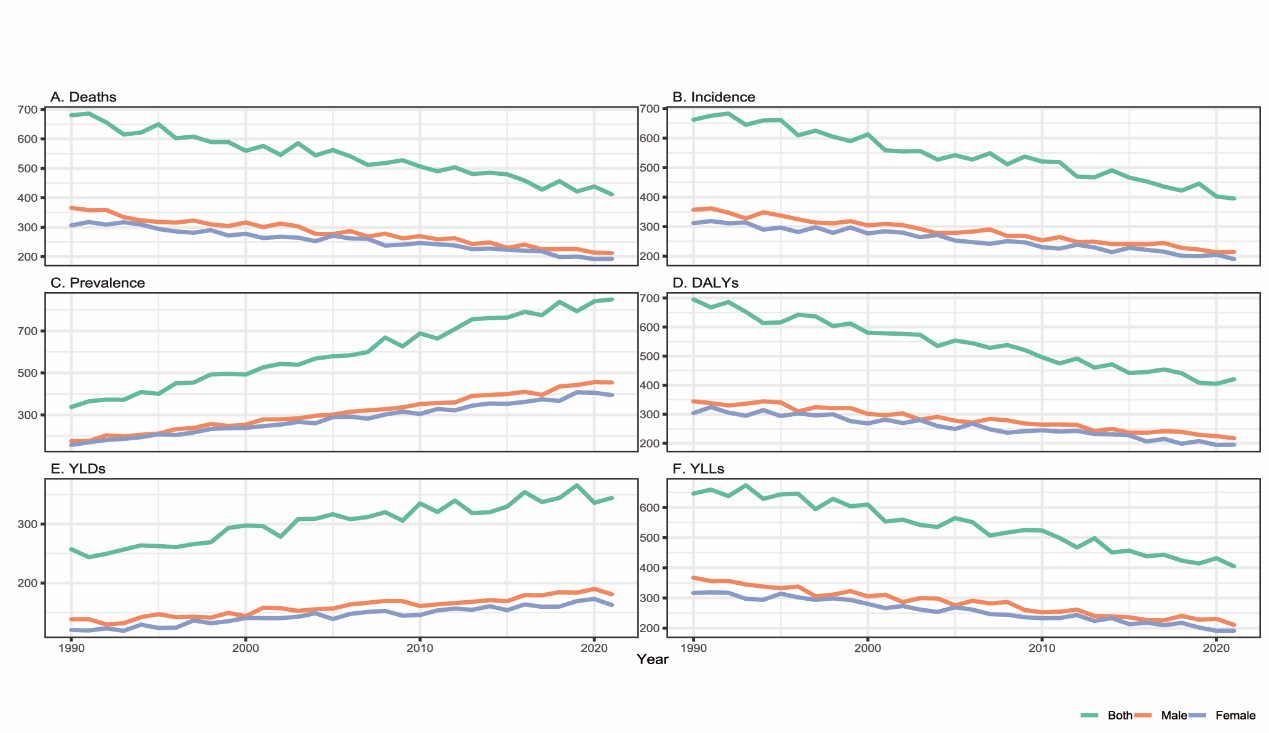


Figure S7 The trend of age-standardized rate of all six measures for neonatal preterm birth in China from 1990 to 2021


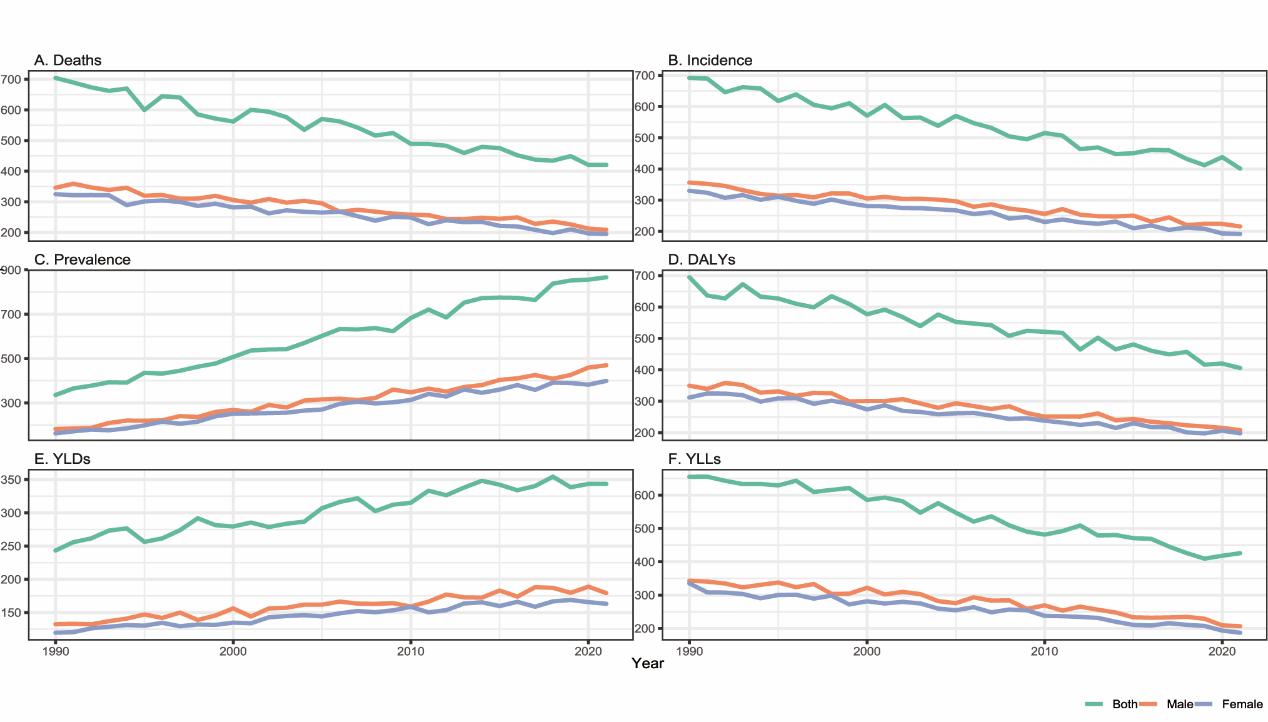


Figure S8 The trend of all-age number of all six measures for neonatal sepsis and other neonatal infections in China from 1990 to 2021


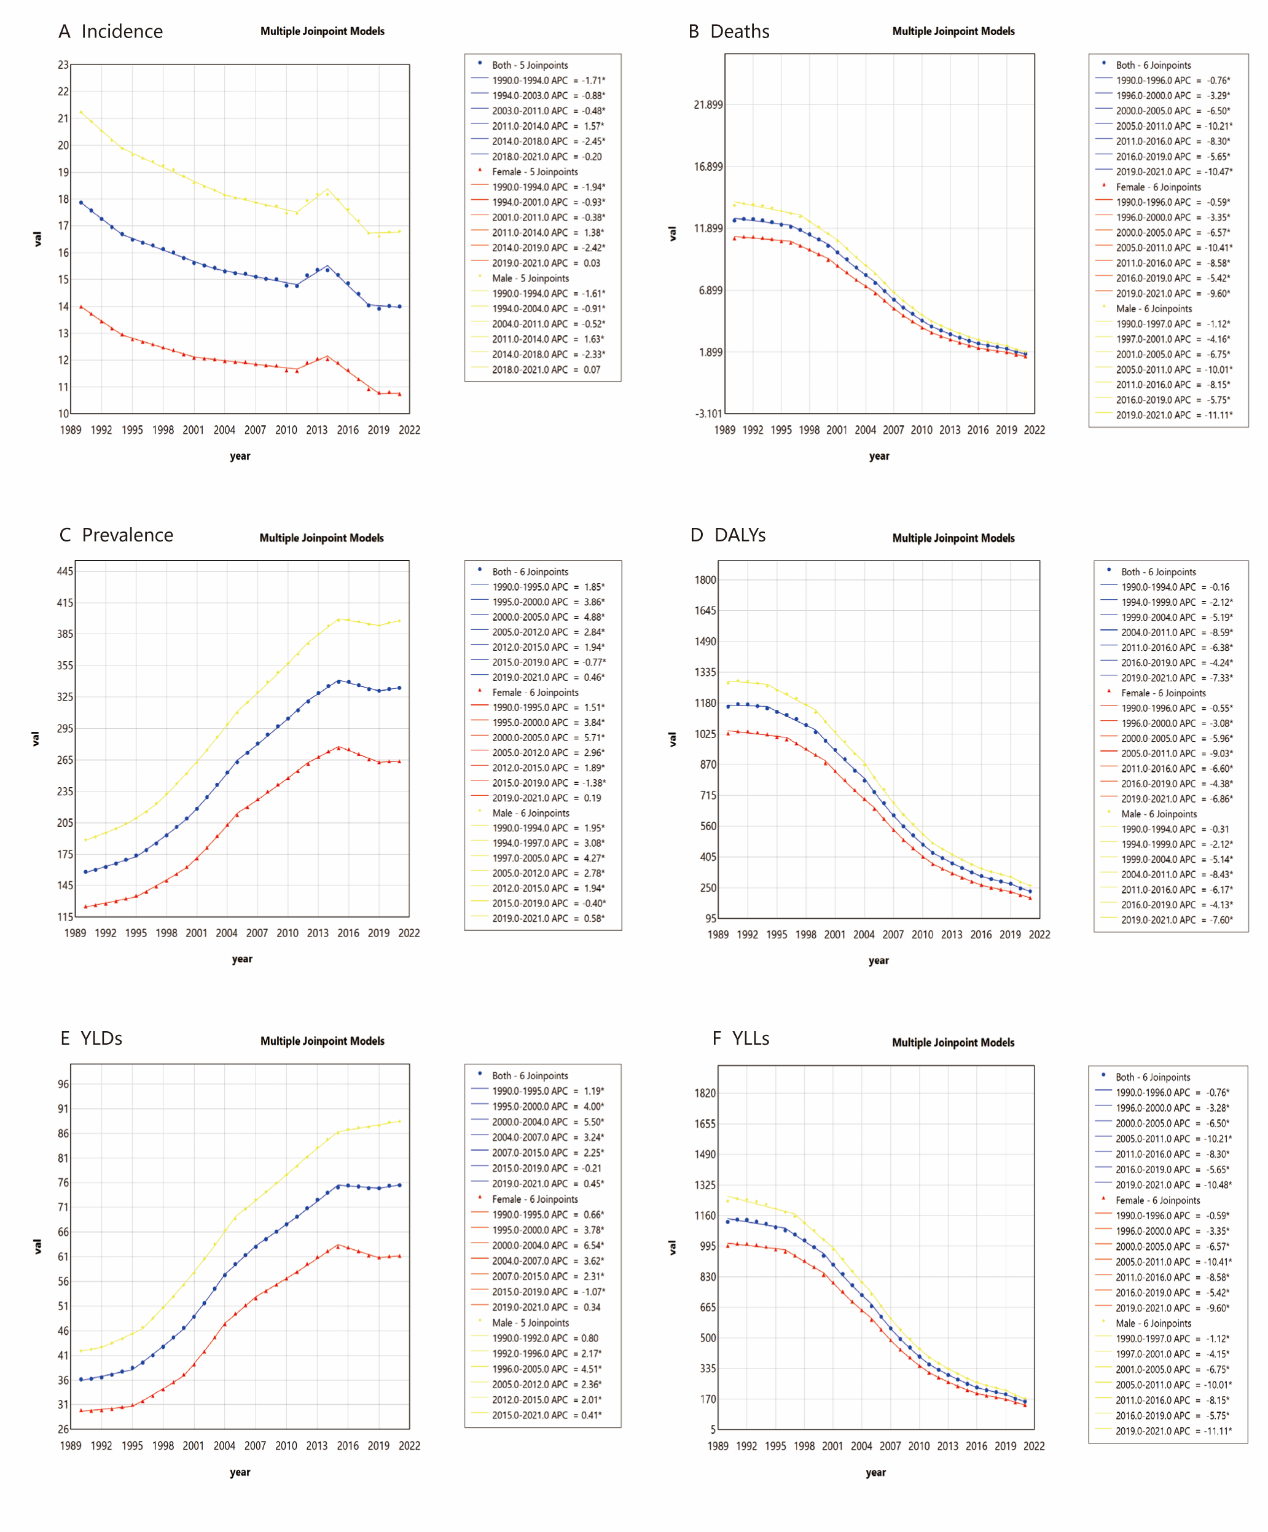


Figure S9. Joinpoint regression analysis of trends in age-standardized rates for neonatal encephalopathy due to birth asphyxia and trauma in China, 1990-2021


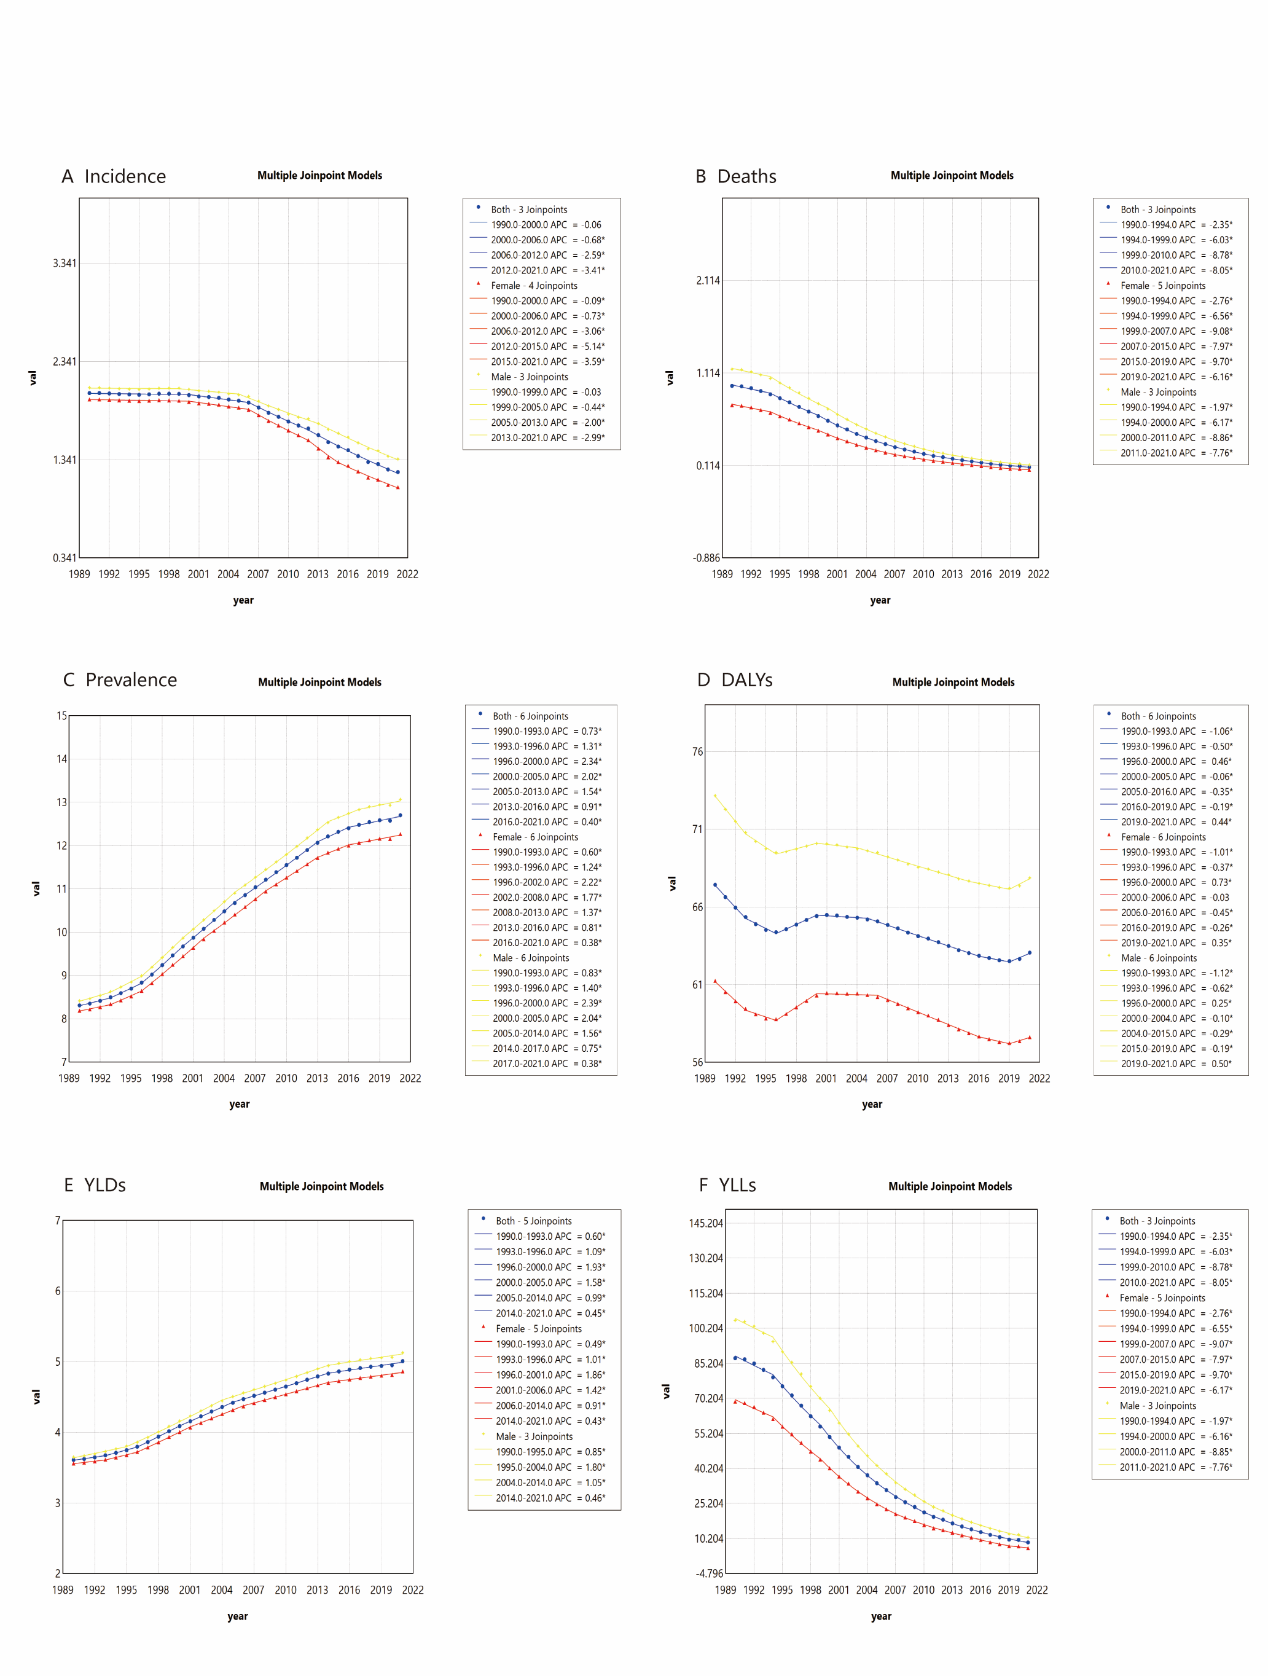


Figure S10. Joinpoint regression analysis of trends in age-standardized rates for hemolytic disease and other neonatal jaundice in China, 1990-2021


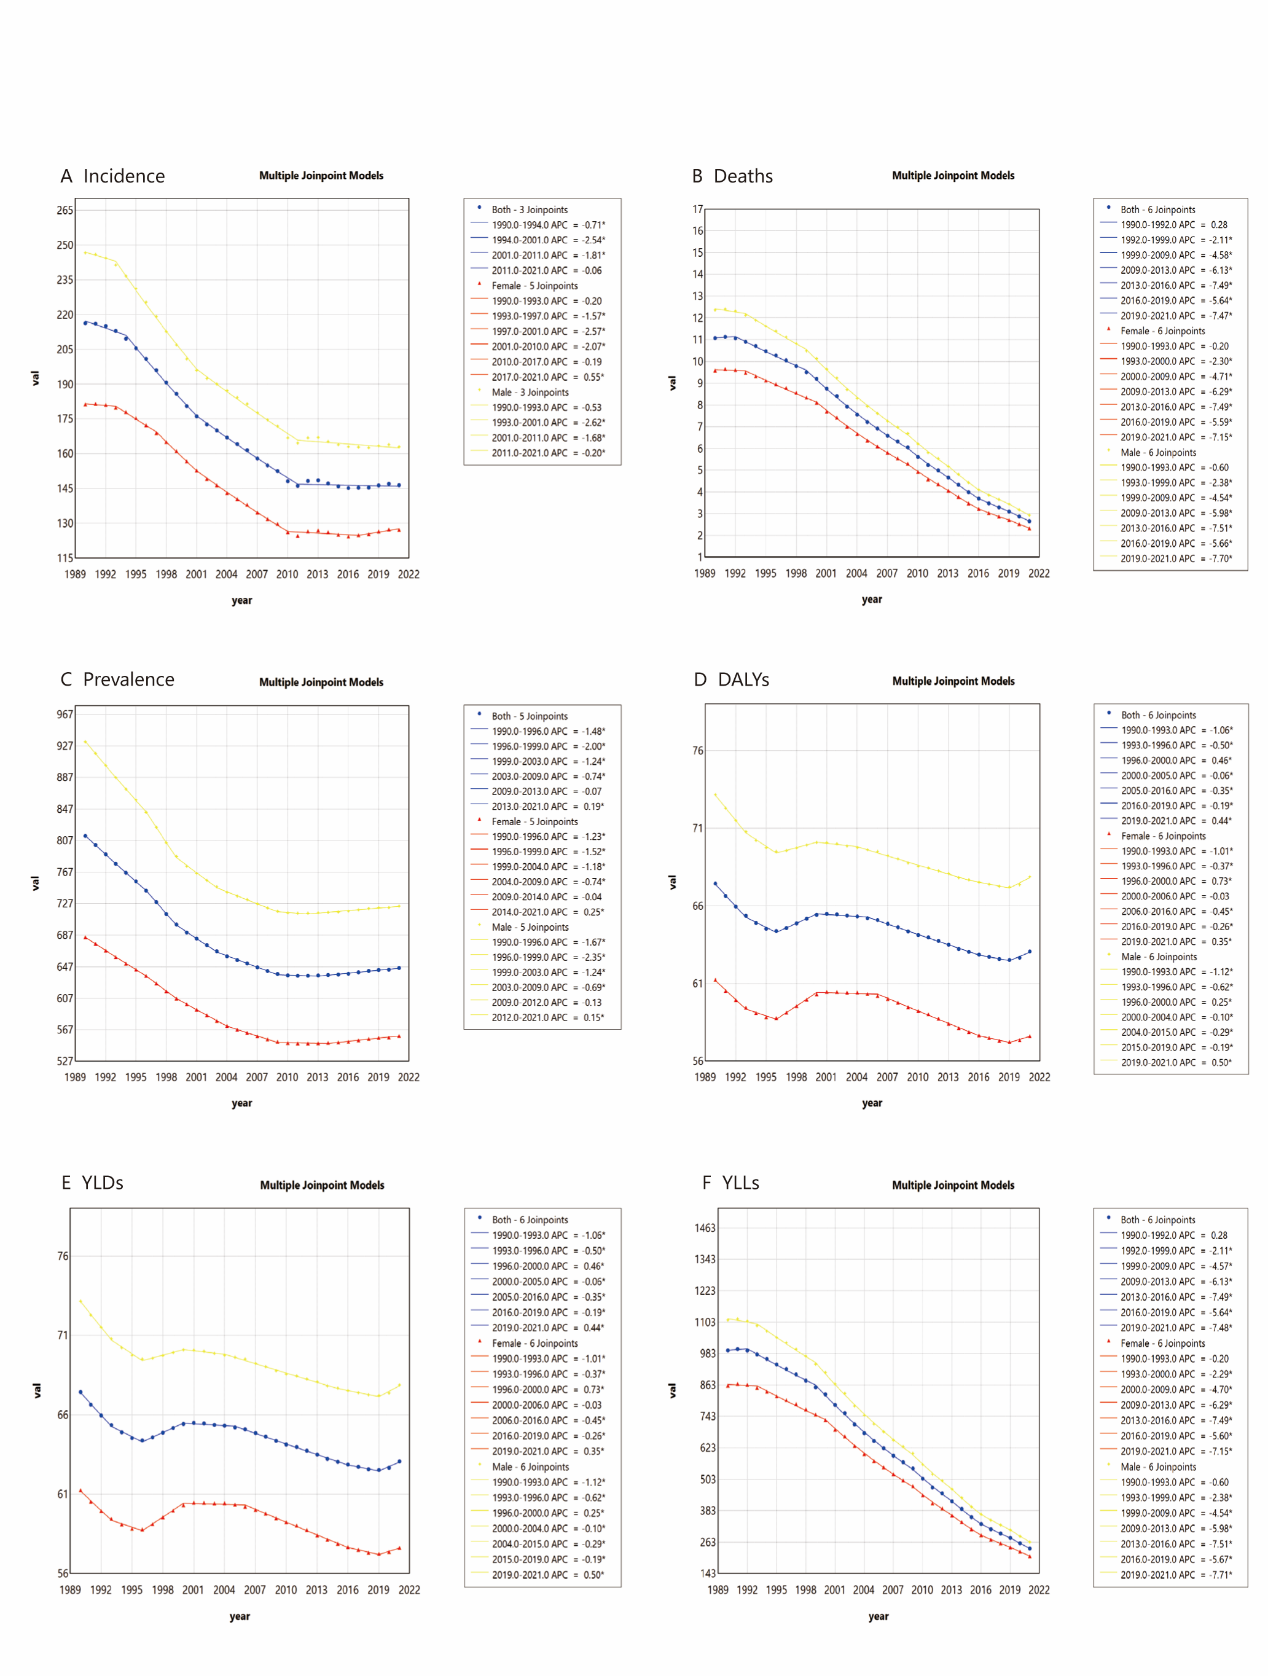


Figure S11. Joinpoint regression analysis of trends in age-standardized rates for neonatal preterm birth in China, 1990-2021


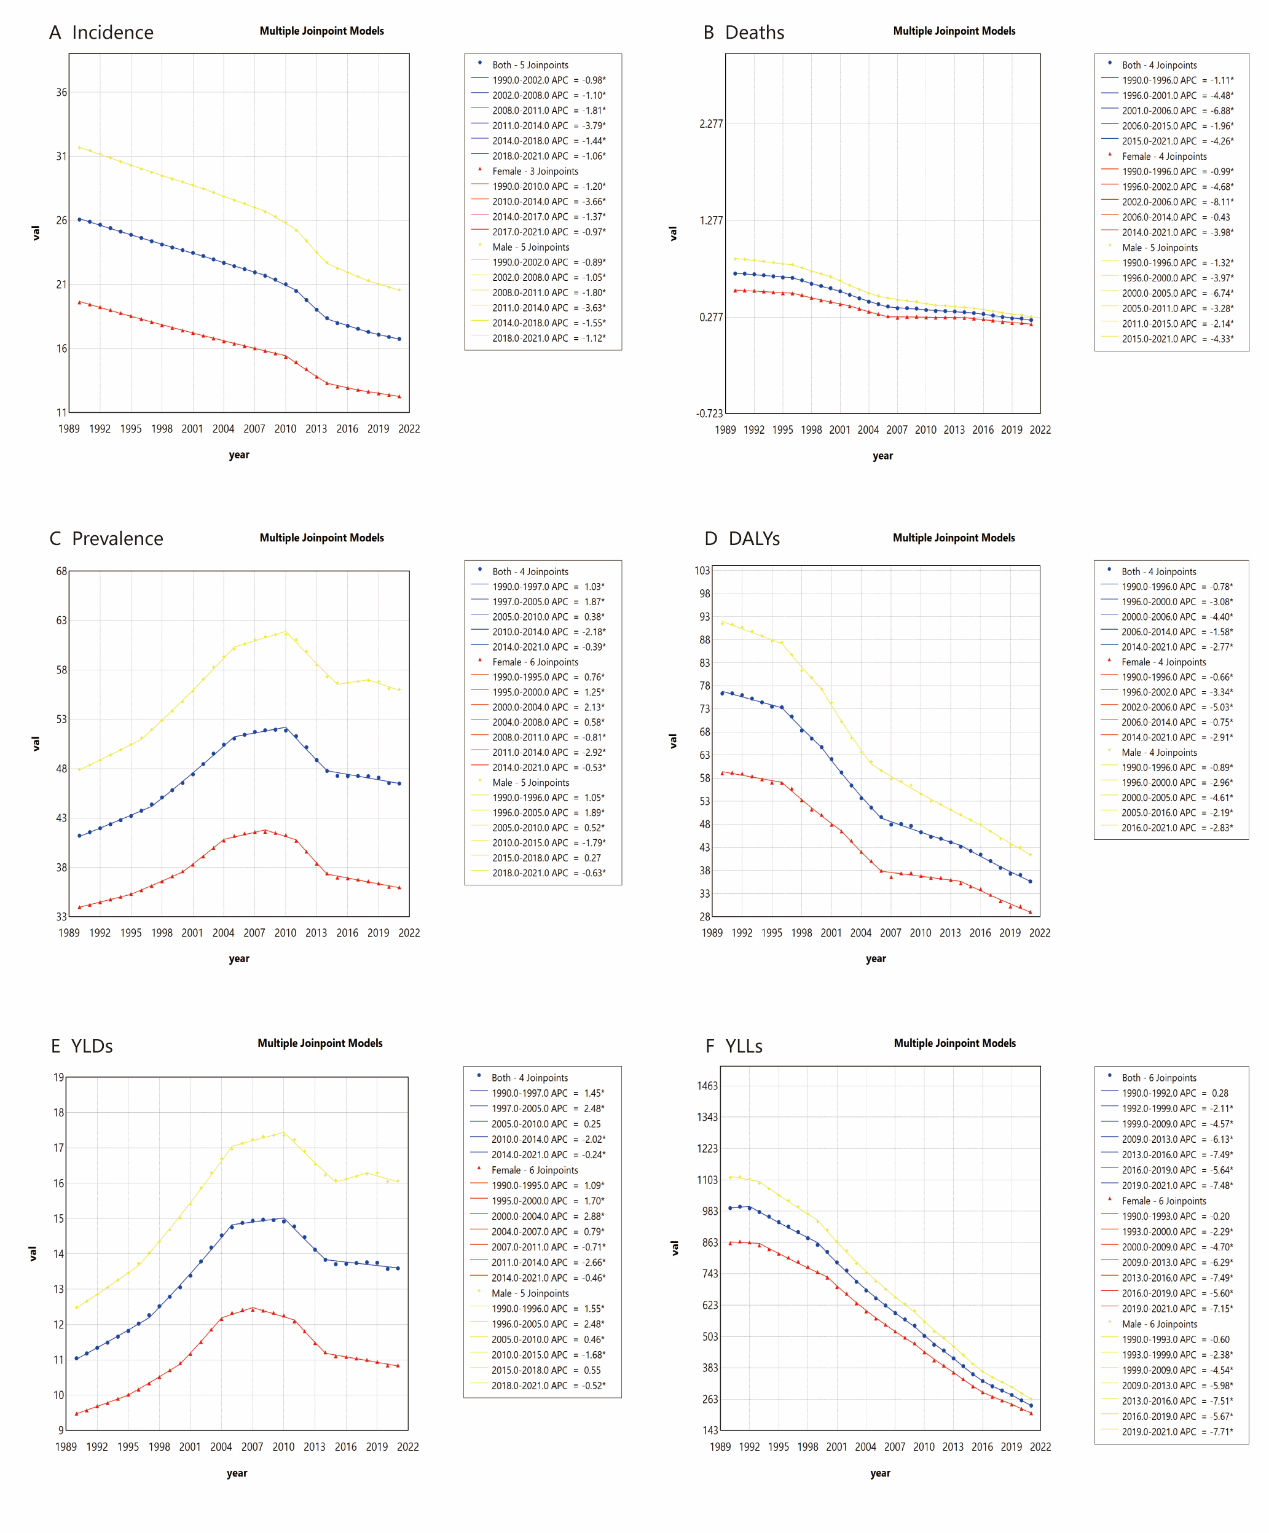


Figure S12. Joinpoint regression analysis of trends in age-standardized rates for neonatal sepsis and other neonatal infections in China, 1990-2021


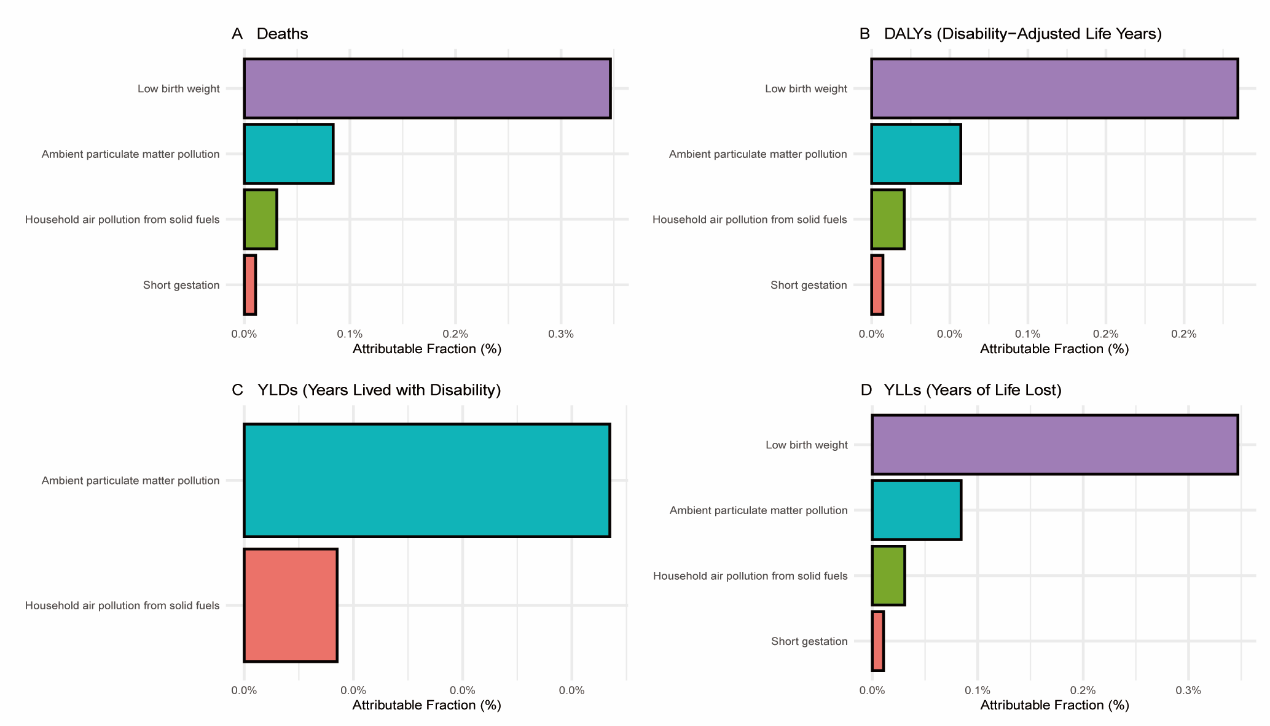


Figure S13. Attributable burden of major risk factors for neonatal encephalopathy due to birth asphyxia and trauma in China,2021


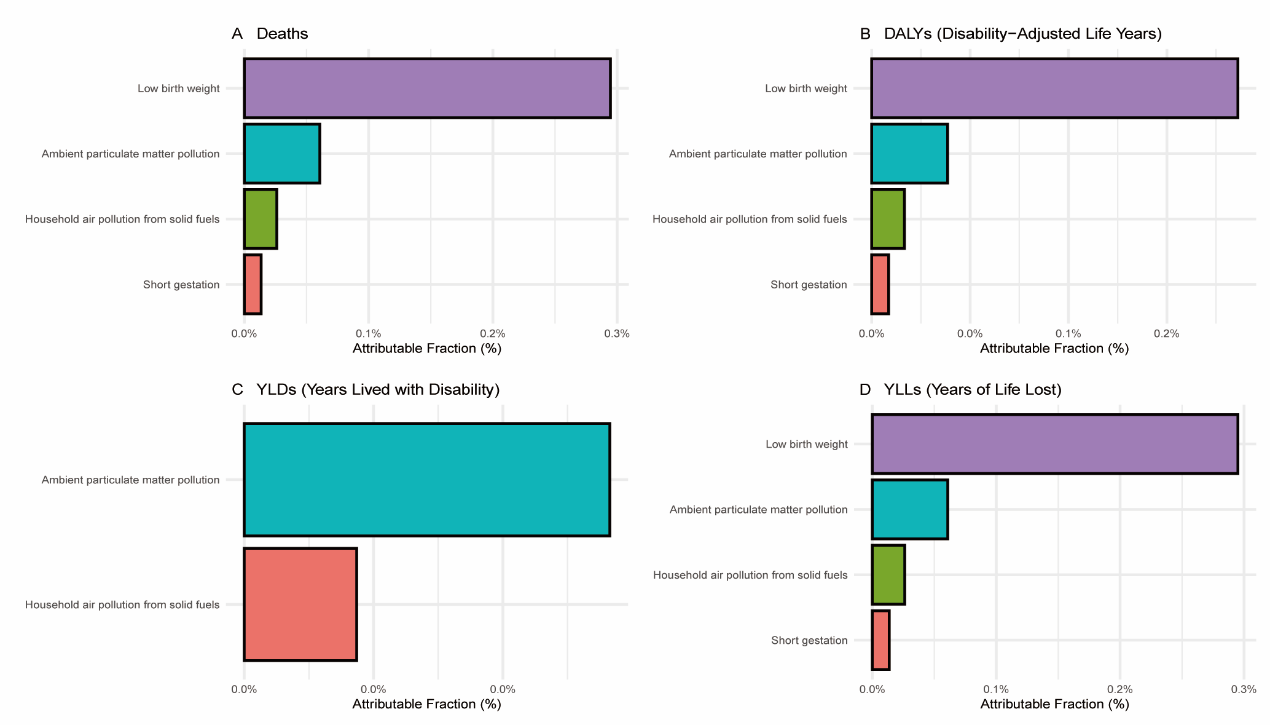


Figure S14. Attributable burden of major risk factors for hemolytic disease and other neonatal jaundice in China,2021


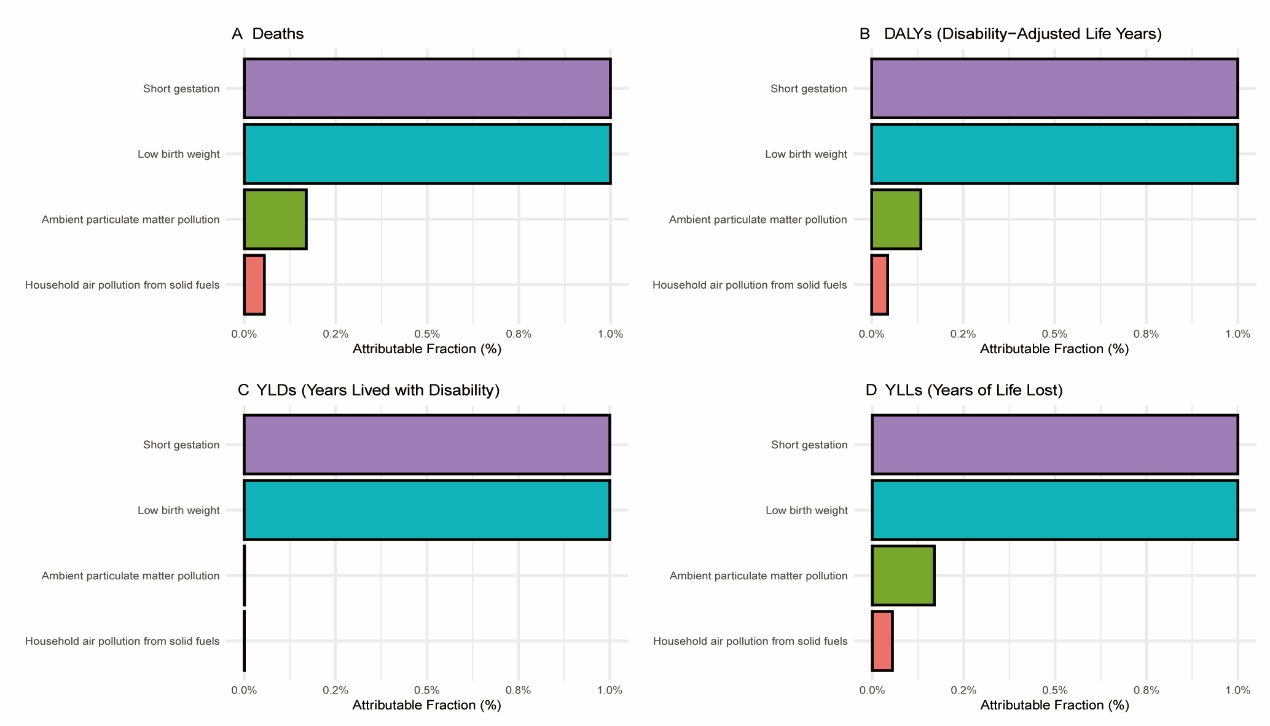


Figure S15. Attributable burden of major risk factors for neonatal preterm birth in China,2021


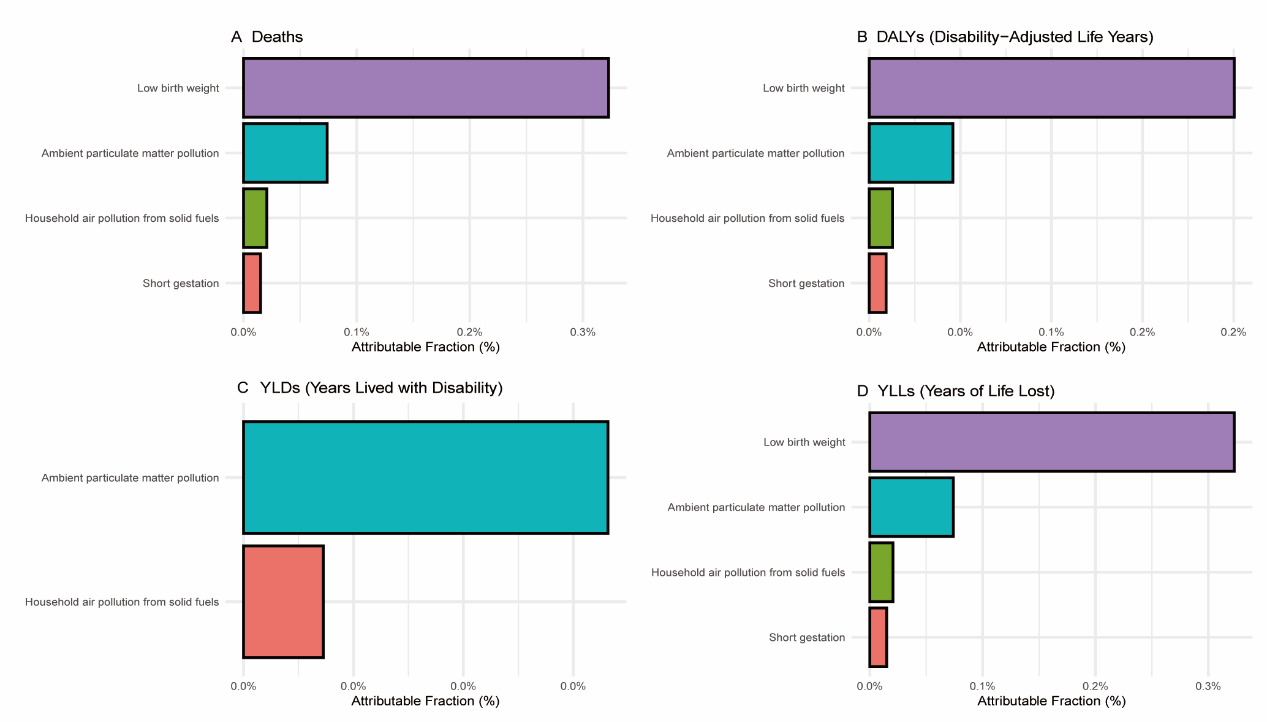


Figure S16. Attributable burden of major risk factors for neonatal sepsis and other neonatal infections in China,2021


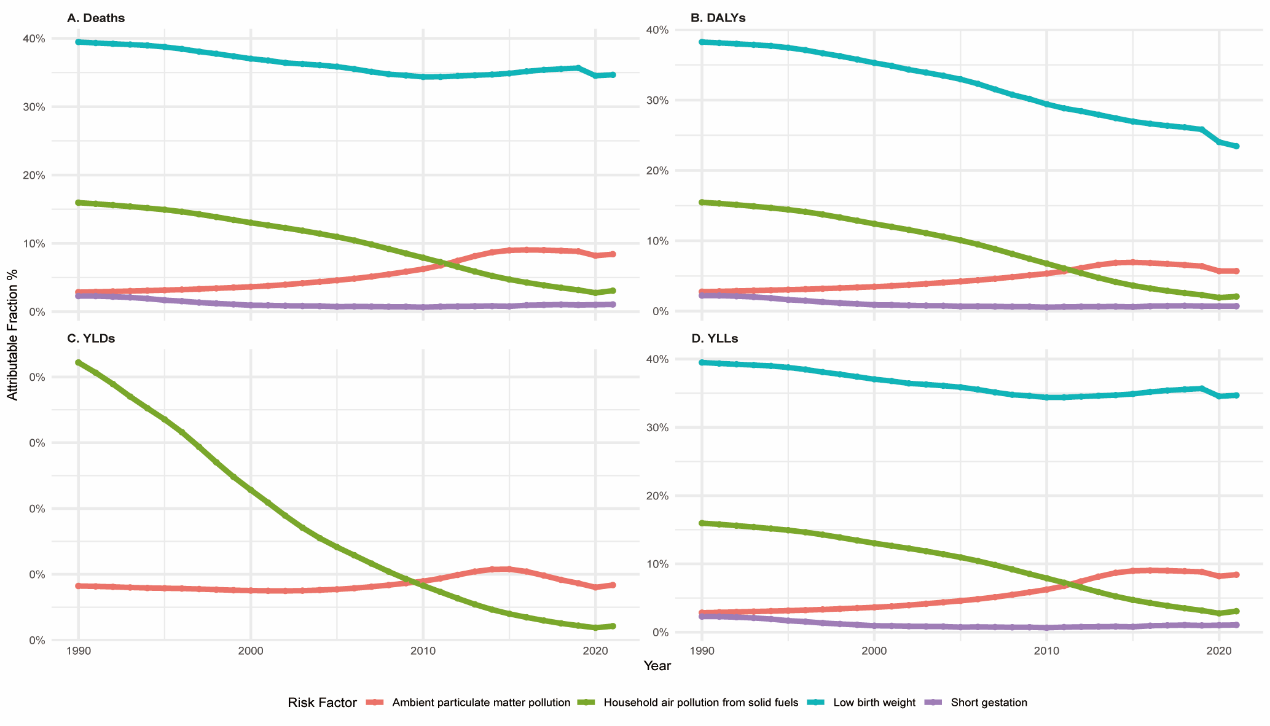


Figure S17. Trends in the proportion of neonatal encephalopathy due to birth asphyxia and trauma burden attributable to major risk factors in China, 1990-2021.


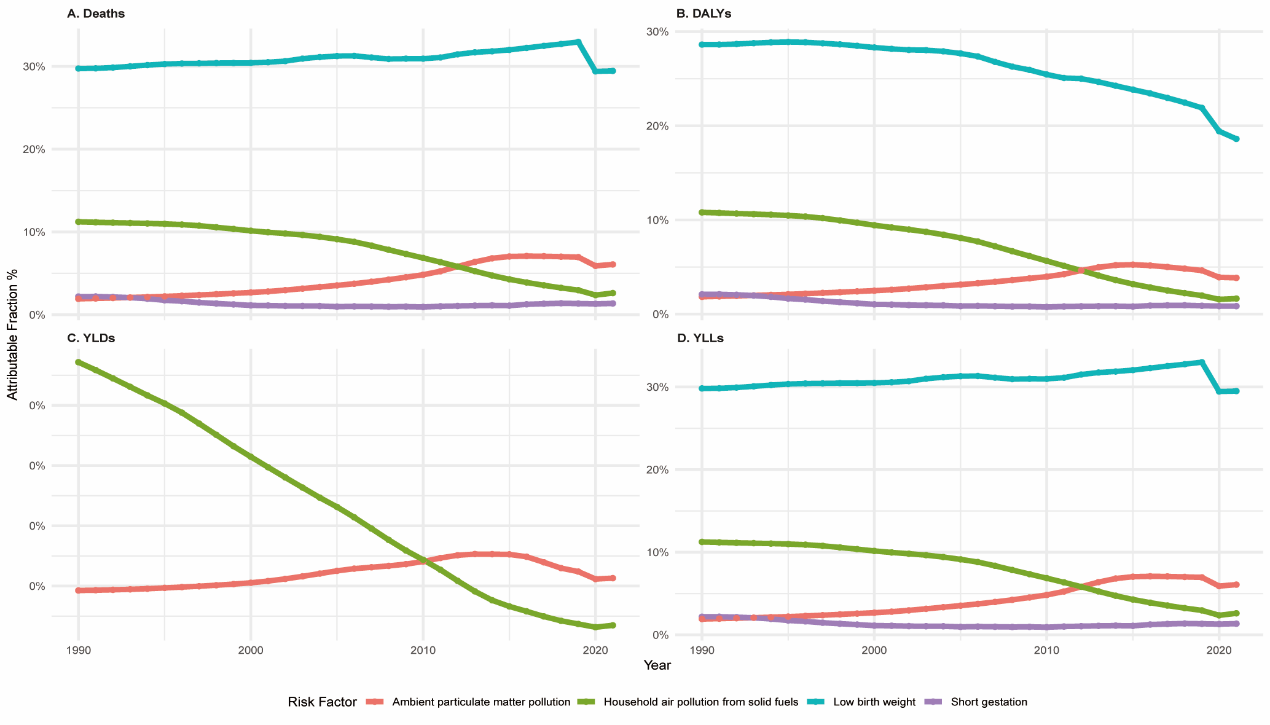


Figure S18. Trends in the proportion of hemolytic disease and other neonatal jaundice burden attributable to major risk factors in China, 1990-2021.


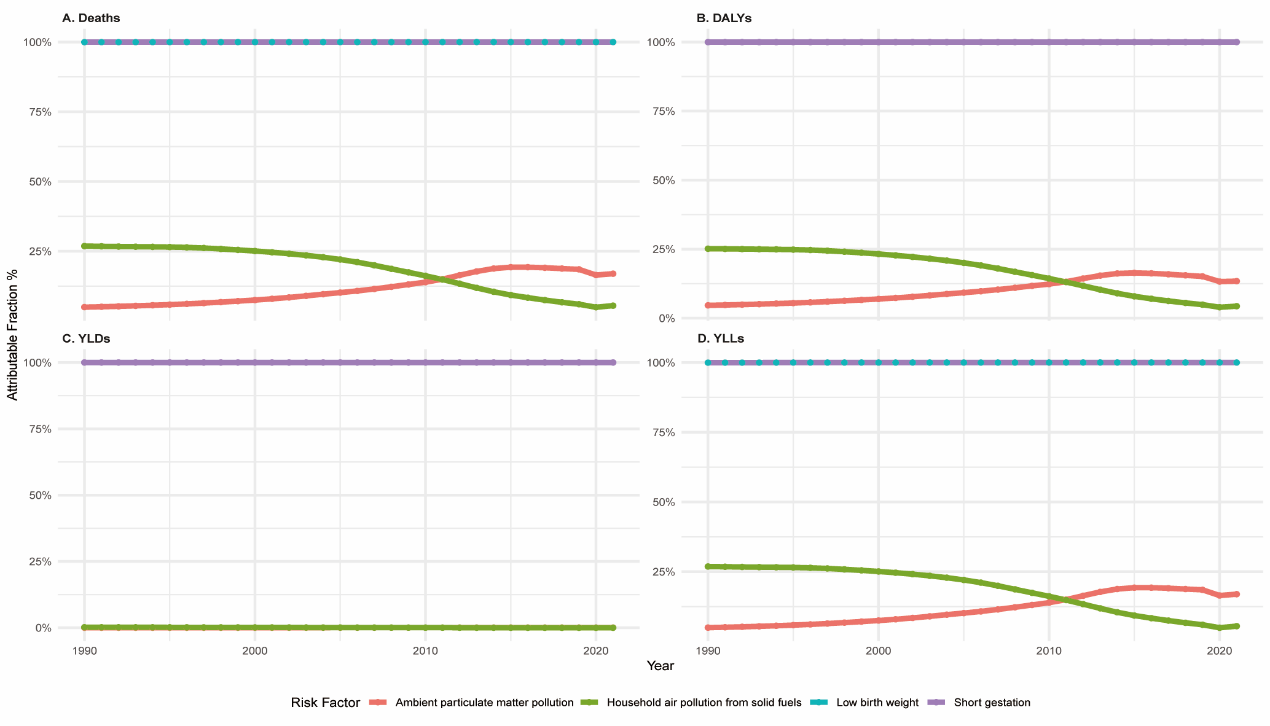


Figure S19. Trends in the proportion of neonatal preterm birth burden attributable to major risk factors in China, 1990-2021.


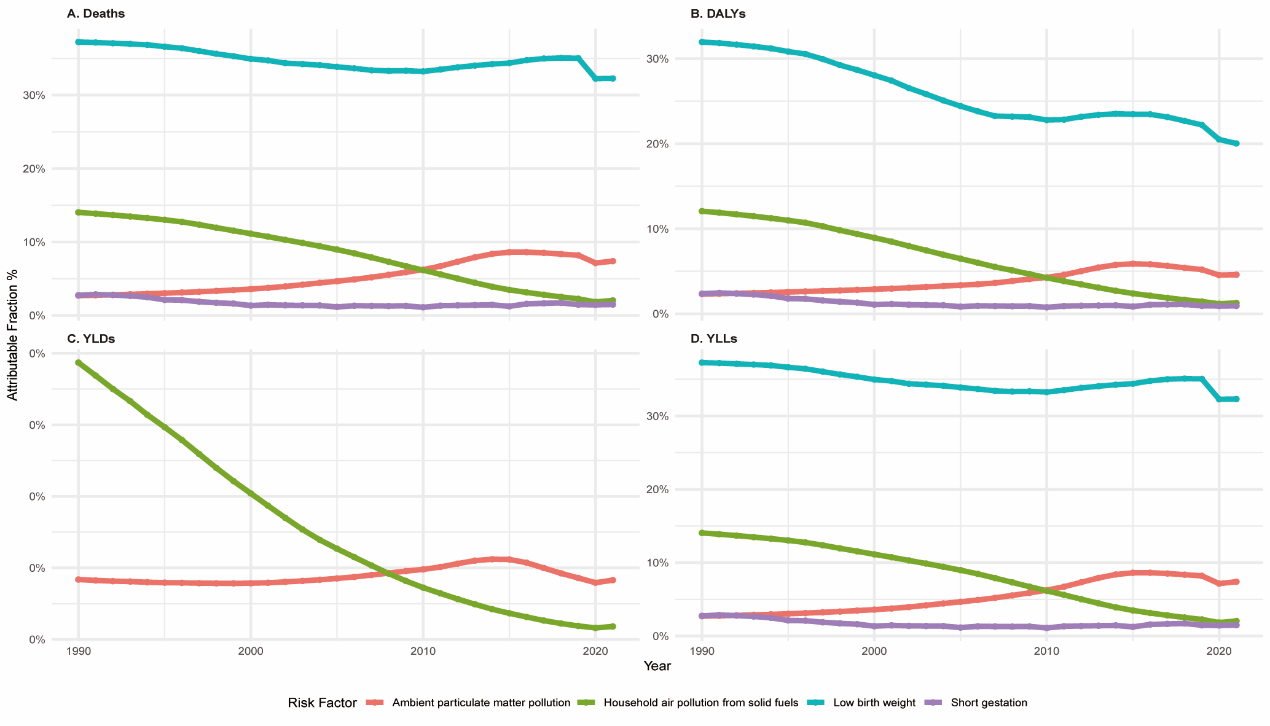


Figure S20. Trends in the proportion of neonatal sepsis and other neonatal infections burden attributable to major risk factors in China, 1990-2021.

**Table S1** All-age number and age-standardized rate of all measures for neonatal encephalopathy due to birth asphyxia and trauma and percentage changes by gender in China, 1990 - 2021

| Measures | All-age number in thousands (95% UI) - 1990 | All-age number in thousands (95% UI) - 2021 | All-age number in thousands (95% UI) - Change, % | Age-standardized rate, per 100,000 (95% UI) - 1990 | Age-standardized rate, per 100,000 (95% UI) - 2021 | Age-standardized rate, per 100,000 (95% UI) - Change, % |
| --- | --- | --- | --- | --- | --- | --- |
| Deaths |  |  |  |  |  |  |
| Total | 138.507 (113.865, 164.944) | 9.361 (7.721, 11.294) | -93.2 (-95.0 to -91.4) | 12.53 (10.3,14.92) | 1.75 (1.44,2.11) | -86.0 (-89.7 to -82.3) |
| Male | 81.538 (64.074, 101.377) | 5.542 (4.485, 6.889) | -93.2 (-95.3 to -91.1) | 13.77 (10.82,17.12) | 1.93 (1.56,2.39) | -86.0 (-90.4 to -81.6) |
| Female | 56.969 (45.413, 68.842) | 3.819 (3.001, 4.630) | -93.3 (-95.3 to -91.3) | 11.09 (8.84,13.4) | 1.55 (1.22,1.87) | -86.0 (-90.1 to -81.9) |
| Incidence |  |  |  |  |  |  |
| Total | 197.585 (185.783, 208.754) | 74.199 (70.061, 78.261) | -62.4 (-65.5 to -59.4) | 17.87 (16.8,18.88) | 14 (13.22,14.77) | -21.7 (-27.9 to -15.4) |
| Male | 125.735 (118.802, 133.752) | 47.912 (45.015, 50.996) | -61.9 (-65.2 to -58.6) | 21.24 (20.07,22.59) | 16.8 (15.78,17.88) | -20.9 (-27.7 to -14.1) |
| Female | 71.850 (64.077, 79.799) | 26.287 (23.741, 29.003) | -63.4 (-68.8 to -58.0) | 13.99 (12.48,15.54) | 10.74 (9.7,11.85) | -23.2 (-34.6 to -11.8) |
| Prevalence |  |  |  |  |  |  |
| Total | 1,897.323 (1,263.270, 2,811.009) | 4,516.708 (3,923.507, 5,126.409) | 138.1 (35.9 to 240.2) | 158.16 (105.75,232.73) | 333.69 (291.04,377.79) | 111.0 (22.0 to 200.0) |
| Male | 1,173.126 (774.343, 1,735.265) | 2,766.193 (2,397.919, 3,154.307) | 135.8 (34.0 to 237.6) | 188.8 (125.33,277.34) | 397.62 (346.04,452.25) | 110.6 (21.3 to 199.9) |
| Female | 724.198 (475.256, 1,081.476) | 1,750.515 (1,512.845, 1,972.856) | 141.7 (35.7 to 247.8) | 125.35 (82.72,185.95) | 263.76 (228.45,296.7) | 110.4 (19.6 to 201.2) |
| DALYS |  |  |  |  |  |  |
| Total | 12,896.610 (10,616.968, 15,268.111) | 1,841.673 (1,544.545, 2,210.266) | -85.7 (-89.4 to -82.1) | 1162.6 (956.99,1376.19) | 232.92 (198.75,272.41) | -80.0 (-84.8 to -75.2) |
| Male | 7,598.717 (6,035.089, 9,398.609) | 1,101.267 (911.612, 1,330.698) | -85.5 (-89.7 to -81.3) | 1280.55 (1016.19,1584.16) | 261.57 (220.24,306.57) | -79.6 (-85.2 to -73.9) |
| Female | 5,297.893 (4,232.225, 6,359.669) | 740.406 (615.515, 890.147) | -86.0 (-89.8 to -82.2) | 1027.04 (820.62,1233.36) | 200.27 (168.39,236.23) | -80.5 (-85.6 to -75.4) |
| YLDs |  |  |  |  |  |  |
| Total | 442.470 (197.553, 903.149) | 999.910 (731.811, 1,311.671) | 126.0 (-65.7 to 317.7) | 36.17 (16.16,73.56) | 75.49 (55.26,98.84) | 108.7 (-67.5 to 284.9) |
| Male | 266.935 (117.461, 551.844) | 602.906 (440.871, 793.046) | 125.9 (-69.4 to 321.1) | 41.95 (18.54,86.67) | 88.41 (64.28,116.07) | 110.8 (-71.2 to 292.7) |
| Female | 175.536 (79.606, 353.719) | 397.004 (292.033, 518.429) | 126.2 (-61.8 to 314.2) | 29.89 (13.58,60.33) | 61.17 (44.96,80.12) | 104.7 (-65.9 to 275.2) |
| YLLs |  |  |  |  |  |  |
| Total | 12,454.140 (10,236.786, 14,833.437) | 841.763 (694.280, 1,015.545) | -93.2 (-95.0 to -91.4) | 1126.43 (925.9,1341.52) | 157.43 (129.79,189.97) | -86.0 (-89.7 to -82.3) |
| Male | 7,331.783 (5,761.324, 9,117.279) | 498.361 (403.277, 619.447) | -93.2 (-95.3 to -91.1) | 1238.6 (973.31,1540.03) | 173.16 (140.15,215.35) | -86.0 (-90.4 to -81.6) |
| Female | 5,122.357 (4,082.722, 6,190.921) | 343.402 (269.876, 416.389) | -93.3 (-95.3 to -91.3) | 997.15 (794.79,1205.13) | 139.1 (109.34,168.57) | -86.1 (-90.2 to -81.9) |

**Table S2** All-age number and age-standardized rate of all measures for hemolytic disease and other neonatal jaundice and percentage changes by gender in China, 1990 - 2021

| Measures | All-age number in thousands (95% UI) - 1990 | All-age number in thousands (95% UI) - 2021 | All-age number in thousands (95% UI) - Change, % | Age-standardized rate, per 100,000 (95% UI) - 1990 | Age-standardized rate, per 100,000 (95% UI) - 2021 | Age-standardized rate, per 100,000 (95% UI) - Change, % |
| --- | --- | --- | --- | --- | --- | --- |
| Deaths |  |  |  |  |  |  |
| Total | 10.759 (8.347, 14.307) | 0.520 (0.400, 0.672) | -95.2 (-97.0 to -93.3) | 0.97 (0.76,1.29) | 0.1 (0.07,0.12) | -89.7 (-93.5 to -85.9) |
| Male | 6.820 (5.022, 8.819) | 0.349 (0.261, 0.464) | -94.9 (-96.9 to -92.8) | 1.15 (0.85,1.49) | 0.12 (0.09,0.16) | -89.6 (-93.8 to -85.4) |
| Female | 3.939 (2.563, 6.499) | 0.171 (0.122, 0.234) | -95.7 (-98.3 to -93.1) | 0.77 (0.5,1.26) | 0.07 (0.05,0.09) | -90.9 (-96.1 to -85.7) |
| Incidence |  |  |  |  |  |  |
| Total | 22.317 (12.884, 41.588) | 6.442 (2.470, 15.686) | -71.1 (-106.1 to -36.2) | 2.02 (1.17,3.76) | 1.22 (0.47,2.96) | -39.6 (-112.4 to 33.2) |
| Male | 12.283 (7.190, 22.679) | 3.843 (1.708, 8.845) | -68.7 (-103.8 to -33.6) | 2.07 (1.21,3.83) | 1.35 (0.6,3.1) | -34.8 (-107.9 to 38.4) |
| Female | 10.034 (5.646, 18.909) | 2.599 (0.780, 6.870) | -74.1 (-108.9 to -39.3) | 1.95 (1.1,3.68) | 1.06 (0.32,2.81) | -45.6 (-118.9 to 27.6) |
| Prevalence |  |  |  |  |  |  |
| Total | 101.245 (88.192, 116.511) | 168.721 (153.313, 188.882) | 66.6 (37.5 to 95.8) | 8.31 (7.24,9.56) | 12.7 (11.55,14.24) | 52.8 (26.0 to 79.6) |
| Male | 53.388 (46.604, 61.562) | 88.673 (80.446, 99.386) | 66.1 (36.8 to 95.3) | 8.42 (7.34,9.71) | 13.07 (11.86,14.67) | 55.2 (27.7 to 82.7) |
| Female | 47.857 (41.672, 55.028) | 80.049 (72.689, 89.461) | 67.3 (38.1 to 96.5) | 8.19 (7.13,9.42) | 12.27 (11.16,13.73) | 49.8 (23.6 to 76.0) |
| DALYS |  |  |  |  |  |  |
| Total | 1,009.717 (790.784, 1,335.554) | 113.556 (91.758, 137.367) | -88.8 (-92.5 to -85.0) | 91.04 (71.26,120.38) | 13.59 (11.03,16.38) | -85.1 (-90.1 to -80.1) |
| Male | 635.259 (475.089, 815.788) | 66.359 (53.538, 81.055) | -89.6 (-93.1 to -86.0) | 107.24 (80.12,137.76) | 15.83 (12.49,19.61) | -85.2 (-90.4 to -80.1) |
| Female | 374.459 (251.088, 607.402) | 47.197 (36.997, 58.168) | -87.4 (-94.0 to -80.8) | 72.4 (48.38,117.63) | 10.98 (8.8,13.67) | -84.8 (-92.8 to -76.8) |
| YLDs |  |  |  |  |  |  |
| Total | 43.995 (31.533, 57.196) | 66.814 (47.755, 87.046) | 51.9 (-11.0 to 114.8) | 3.61 (2.59,4.7) | 5.01 (3.59,6.53) | 38.8 (-18.7 to 96.3) |
| Male | 23.165 (16.497, 30.075) | 34.976 (25.121, 45.759) | 51.0 (-11.8 to 113.8) | 3.65 (2.6,4.74) | 5.13 (3.7,6.69) | 40.5 (-17.5 to 98.6) |
| Female | 20.830 (14.999, 27.233) | 31.838 (22.816, 41.224) | 52.8 (-10.1 to 115.8) | 3.56 (2.57,4.66) | 4.86 (3.48,6.32) | 36.5 (-20.0 to 93.1) |
| YLLs |  |  |  |  |  |  |
| Total | 965.722 (749.239, 1,285.369) | 46.742 (35.947, 60.318) | -95.2 (-97.0 to -93.3) | 87.43 (67.84,116.27) | 8.58 (6.6,11.07) | -90.2 (-93.9 to -86.5) |
| Male | 612.094 (450.707, 791.592) | 31.383 (23.398, 41.662) | -94.9 (-96.9 to -92.8) | 103.59 (76.28,133.96) | 10.7 (7.98,14.19) | -89.7 (-93.8 to -85.5) |
| Female | 353.629 (230.090, 583.880) | 15.359 (10.972, 21.028) | -95.7 (-98.3 to -93.1) | 68.83 (44.8,113.59) | 6.12 (4.37,8.38) | -91.1 (-96.4 to -85.8) |

**Table S3** All-age number and age-standardized rate of all measures for neonatal preterm birth and percentage changes by gender in China, 1990 - 2021

| Measures | All-age number in thousands (95% UI) - 1990 | All-age number in thousands (95% UI) - 2021 | All-age number in thousands (95% UI) - Change, % | Age-standardized rate, per 100,000 (95% UI) - 1990 | Age-standardized rate, per 100,000 (95% UI) - 2021 |
| --- | --- | --- | --- | --- | --- |
| Deaths |  |  |  |  |  |
| Total | 122.329 (98.033, 153.495) | 14.249 (11.856, 17.043) | -88.4 (-91.7 to -85.0) | 11.07 (8.87,13.89) | 2.65 (2.21,3.17) |
| Male | 73.131 (57.437, 96.279) | 8.478 (6.843, 10.328) | -88.4 (-92.3 to -84.5) | 12.36 (9.71,16.27) | 2.93 (2.37,3.57) |
| Female | 49.197 (38.992, 64.290) | 5.771 (4.654, 6.887) | -88.3 (-92.0 to -84.5) | 9.58 (7.59,12.52) | 2.33 (1.88,2.78) |
| Incidence |  |  |  |  |  |
| Total | 2,391.017 (2,334.475, 2,443.997) | 776.286 (759.208, 795.769) | -67.5 (-68.6 to -66.5) | 216.27 (211.16,221.06) | 146.46 (143.24,150.14) |
| Male | 1,460.057 (1,419.949, 1,499.871) | 464.851 (449.675, 479.365) | -68.2 (-69.5 to -66.8) | 246.6 (239.82,253.32) | 162.99 (157.67,168.08) |
| Female | 930.959 (899.358, 963.993) | 311.435 (301.310, 323.140) | -66.5 (-68.2 to -64.9) | 181.3 (175.15,187.74) | 127.21 (123.07,131.99) |
| Prevalence |  |  |  |  |  |
| Total | 9,498.917 (8,196.799, 10,897.739) | 7,907.240 (6,878.507, 9,093.867) | -16.8 (-33.4 to -0.1) | 812.75 (702.2,931.17) | 645.4 (572.51,728.13) |
| Male | 5,662.675 (4,875.964, 6,491.905) | 4,573.579 (3,973.005, 5,271.404) | -19.2 (-35.5 to -3.0) | 932.23 (803.71,1068.06) | 723.85 (641.63,818.69) |
| Female | 3,836.242 (3,323.713, 4,420.913) | 3,333.661 (2,909.021, 3,821.376) | -13.1 (-30.3 to 4.1) | 684.49 (595.08,786.92) | 559.35 (497.54,629.99) |
| DALYS |  |  |  |  |  |
| Total | 11,817.964 (9,669.214, 14,674.985) | 2,113.784 (1,782.329, 2,466.912) | -82.1 (-86.9 to -77.3) | 1062.14 (867.3,1320.97) | 301.59 (260.49,351.77) |
| Male | 7,037.566 (5,648.527, 9,085.849) | 1,219.780 (1,026.155, 1,449.231) | -82.7 (-87.9 to -77.5) | 1184.11 (949.36,1530.43) | 331.44 (278.53,394.05) |
| Female | 4,780.398 (3,834.090, 6,186.073) | 894.004 (749.605, 1,052.852) | -81.3 (-86.9 to -75.7) | 921.94 (739.11,1195.56) | 267 (225.86,311.67) |
| YLDs |  |  |  |  |  |
| Total | 824.193 (587.355, 1,089.549) | 832.785 (595.325, 1,066.131) | 1.0 (-41.0 to 43.0) | 67.43 (48.07,89.11) | 63.06 (45.22,80.65) |
| Male | 464.455 (332.740, 615.397) | 457.648 (327.457, 585.184) | -1.5 (-42.3 to 39.4) | 73.17 (52.39,96.72) | 67.88 (48.73,86.82) |
| Female | 359.738 (255.950, 473.394) | 375.136 (267.029, 484.836) | 4.3 (-39.4 to 48.0) | 61.25 (43.49,80.54) | 57.63 (40.94,74.21) |
| YLLs |  |  |  |  |  |
| Total | 10,993.770 (8,807.665, 13,795.545) | 1,280.999 (1,065.984, 1,532.088) | -88.3 (-91.7 to -85.0) | 994.7 (797.03,1248.17) | 238.53 (198.67,285.15) |
| Male | 6,573.110 (5,161.866, 8,654.343) | 762.132 (615.143, 928.418) | -88.4 (-92.3 to -84.5) | 1110.94 (872.51,1462.59) | 263.56 (212.87,320.92) |
| Female | 4,420.660 (3,502.869, 5,777.733) | 518.868 (418.446, 619.219) | -88.3 (-92.0 to -84.5) | 860.69 (681.97,1124.92) | 209.38 (168.82,249.83) |

**Table S4** All-age number and age-standardized rate of all measures for neonatal sepsis and other neonatal infections and percentage changes by gender in China, 1990 - 2021

| Measures | All-age number in thousands (95% UI) - 1990 | All-age number in thousands (95% UI) - 2021 | All-age number in thousands (95% UI) - Change, % | Age-standardized rate, per 100,000 (95% UI) - 1990 | Age-standardized rate, per 100,000 (95% UI) - 2021 | Age-standardized rate, per 100,000 (95% UI) - Change, % |
| --- | --- | --- | --- | --- | --- | --- |
| Deaths |  |  |  |  |  |  |
| Total | 8.036 (6.523, 9.747) | 1.326 (0.979, 1.667) | -83.5 (-88.9 to -78.1) | 0.73 (0.59,0.88) | 0.25 (0.18,0.31) | -65.8 (-77.0 to -54.5) |
| Male | 5.198 (3.979, 6.481) | 0.820 (0.609, 1.037) | -84.2 (-89.8 to -78.6) | 0.88 (0.67,1.09) | 0.28 (0.21,0.36) | -68.2 (-79.6 to -56.8) |
| Female | 2.838 (2.251, 3.435) | 0.506 (0.339, 0.644) | -82.2 (-88.7 to -75.6) | 0.55 (0.44,0.67) | 0.2 (0.14,0.26) | -63.6 (-76.9 to -50.3) |
| Incidence |  |  |  |  |  |  |
| Total | 288.514 (273.331, 307.095) | 89.356 (86.595, 92.234) | -69.0 (-71.1 to -67.0) | 26.07 (24.7,27.75) | 16.75 (16.24,17.3) | -35.7 (-40.0 to -31.5) |
| Male | 176.824 (176.014, 187.697) | 59.100 (56.889, 61.356) | -68.5 (-70.9 to -66.1) | 31.68 (29.84,34) | 20.6 (19.82,21.38) | -35.0 (-39.9 to -30.0) |
| Female | 100.817 (95.009, 106.550) | 30.256 (29.152, 31.307) | -70.0 (-72.3 to -67.7) | 19.61 (18.48,21.11) | 12.28 (11.83,12.71) | -37.4 (-42.1 to -32.6) |
| Prevalence |  |  |  |  |  |  |
| Total | 494.260 (319.572, 750.822) | 617.311 (473.029, 773.938) | 24.9 (-37.5 to 87.3) | 41.22 (26.68,62.38) | 46.49 (35.64,58.14) | 12.8 (-43.0 to 68.6) |
| Male | 298.338 (194.721, 456.820) | 382.037 (293.706, 478.944) | 28.1 (-36.2 to 92.3) | 47.92 (31.48,72.91) | 56.02 (43.03,70.04) | 16.9 (-41.0 to 74.8) |
| Female | 195.921 (125.545, 296.356) | 235.274 (180.181, 298.569) | 20.1 (-40.0 to 80.2) | 33.99 (21.88,51.09) | 35.99 (27.62,45.17) | 5.9 (-46.4 to 58.2) |
| DALYS |  |  |  |  |  |  |
| Total | 857.064 (685.023, 1049.130) | 301.330 (231.399, 390.032) | -64.8 (-76.7 to -52.9) | 76.35 (61.38,93.59) | 35.67 (28.11,44.46) | -53.3 (-67.8 to -38.7) |
| Male | 546.570 (420.222, 683.993) | 184.299 (139.313, 237.477) | -66.3 (-78.6 to -54.0) | 91.41 (70.16,115.3) | 41.46 (32.28,51.96) | -54.6 (-70.2 to -39.1) |
| Female | 310.495 (242.353, 384.417) | 117.031 (88.176, 152.765) | -62.3 (-75.8 to -48.8) | 59.08 (46.46,72.17) | 29.08 (22.17,36.5) | -50.8 (-67.0 to -34.6) |
| YLDs |  |  |  |  |  |  |
| Total | 134.793 (52.456, 260.900) | 182.139 (111.676, 260.556) | 35.1 (-83.1 to 153.3) | 11.04 (4.28,21.3) | 13.59 (8.34,19.38) | 23.1 (-84.2 to 130.4) |
| Male | 79.276 (29.607, 154.365) | 110.577 (68.583, 159.626) | 39.5 (-84.4 to 163.4) | 12.48 (4.66,24.11) | 16.07 (9.98,23.12) | 28.8 (-84.5 to 142.1) |
| Female | 55.517 (23.519, 109.196) | 71.562 (43.521, 103.028) | 28.9 (-84.1 to 141.9) | 9.48 (3.99,18.57) | 10.84 (6.61,15.54) | 14.3 (-85.4 to 114.1) |
| YLLs |  |  |  |  |  |  |
| Total | 722.271 (586.180, 876.140) | 119.191 (87.996, 149.846) | -83.5 (-88.9 to -78.1) | 65.31 (53.01,79.22) | 22.09 (16.32,27.77) | -66.2 (-77.3 to -55.1) |
| Male | 467.294 (357.668, 582.800) | 73.718 (54.742, 93.163) | -84.2 (-89.8 to -78.6) | 78.93 (60.43,98.43) | 25.39 (18.88,32.05) | -67.8 (-79.2 to -56.4) |
| Female | 254.978 (202.257, 308.706) | 45.474 (30.484, 57.841) | -82.2 (-88.7 to -75.6) | 49.6 (39.36,60.07) | 18.24 (12.23,23.18) | -63.2 (-76.7 to -49.8) |

**Table S5** Joinpoint regression analysis of trends in age-standardized rates for neonatal encephalopathy due to birth asphyxia and trauma in China, 1990-2021

| Measure | sex | Segment | Segment.Start | Segment.End | APC | lower | upper | P.Value | AAPC |
| --- | --- | --- | --- | --- | --- | --- | --- | --- | --- |
| Death |  |  |  |  |  |  |  |  |  |
|  | Both | 0 | 1990 | 1996 | -0.76 | -1.09 | -0.42 | p<0.05 | -6.22 (-6.48 - -5.96) |
|  |  | 1 | 1996 | 2000 | -3.29 | -4.17 | -2.4 | p<0.05 |  |
|  |  | 2 | 2000 | 2005 | -6.5 | -7.1 | -5.9 | p<0.05 |  |
|  |  | 3 | 2005 | 2011 | -10.21 | -10.57 | -9.85 | p<0.05 |  |
|  |  | 4 | 2011 | 2016 | -8.3 | -8.83 | -7.77 | p<0.05 |  |
|  |  | 5 | 2016 | 2019 | -5.65 | -7.47 | -3.8 | p<0.05 |  |
|  |  | 6 | 2019 | 2021 | -10.47 | -12.3 | -8.61 | p<0.05 |  |
|  | Female | 0 | 1990 | 1996 | -0.59 | -0.91 | -0.27 | p<0.05 | -6.21 (-6.46 - -5.97) |
|  |  | 1 | 1996 | 2000 | -3.35 | -4.2 | -2.5 | p<0.05 |  |
|  |  | 2 | 2000 | 2005 | -6.57 | -7.12 | -6.01 | p<0.05 |  |
|  |  | 3 | 2005 | 2011 | -10.41 | -10.75 | -10.06 | p<0.05 |  |
|  |  | 4 | 2011 | 2016 | -8.58 | -9.04 | -8.11 | p<0.05 |  |
|  |  | 5 | 2016 | 2019 | -5.42 | -7.08 | -3.73 | p<0.05 |  |
|  |  | 6 | 2019 | 2021 | -9.6 | -11.34 | -7.82 | p<0.05 |  |
|  | Male | 0 | 1990 | 1997 | -1.12 | -1.42 | -0.81 | p<0.05 | -6.25 (-6.54 - -5.94) |
|  |  | 1 | 1997 | 2001 | -4.16 | -5.17 | -3.14 | p<0.05 |  |
|  |  | 2 | 2001 | 2005 | -6.75 | -7.78 | -5.72 | p<0.05 |  |
|  |  | 3 | 2005 | 2011 | -10.01 | -10.39 | -9.63 | p<0.05 |  |
|  |  | 4 | 2011 | 2016 | -8.15 | -8.73 | -7.56 | p<0.05 |  |
|  |  | 5 | 2016 | 2019 | -5.75 | -7.73 | -3.72 | p<0.05 |  |
|  |  | 6 | 2019 | 2021 | -11.11 | -13.18 | -8.99 | p<0.05 |  |

**Table S6** joinpoint regression analysis of trends in age-standardized rates for hemolytic disease and other neonatal jaundice in China, 1990-2021

| Measure | sex | Segment | Segment.Start | Segment.End | APC | lower | upper | P.Value | AAPC |
| --- | --- | --- | --- | --- | --- | --- | --- | --- | --- |
| Deaths |  |  |  |  |  |  |  |  |  |
|  | Both | 0 | 1990 | 1994 | -2.35 | -3.76 | -0.91 | p<0.05 | -7.27 (-7.53 - -7.01) |
|  |  | 1 | 1994 | 1999 | -6.03 | -7.14 | -4.91 | p<0.05 |  |
|  |  | 2 | 1999 | 2010 | -8.78 | -9 | -8.56 | p<0.05 |  |
|  |  | 3 | 2010 | 2021 | -8.05 | -8.28 | -7.82 | p<0.05 |  |
|  | Female | 0 | 1990 | 1994 | -2.76 | -4.25 | -1.24 | p<0.05 | -7.49 (-7.84 - -7.13) |
|  |  | 1 | 1994 | 1999 | -6.56 | -7.7 | -5.41 | p<0.05 |  |
|  |  | 2 | 1999 | 2007 | -9.08 | -9.41 | -8.74 | p<0.05 |  |
|  |  | 3 | 2007 | 2015 | -7.97 | -8.26 | -7.68 | p<0.05 |  |
|  |  | 4 | 2015 | 2019 | -9.7 | -11.01 | -8.38 | p<0.05 |  |
|  |  | 5 | 2019 | 2021 | -6.16 | -9.29 | -2.92 | p<0.05 |  |
|  | Male | 0 | 1990 | 1994 | -1.97 | -3.19 | -0.75 | p<0.05 | -7.12 (-7.34 - -6.90) |
|  |  | 1 | 1994 | 2000 | -6.17 | -6.9 | -5.43 | p<0.05 |  |
|  |  | 2 | 2000 | 2011 | -8.86 | -9.06 | -8.65 | p<0.05 |  |
|  |  | 3 | 2011 | 2021 | -7.76 | -7.99 | -7.52 | p<0.05 |  |
|  |  |  |  |  |  |  |  |  |  |
| Incidence |  |  |  |  |  |  |  |  |  |
|  | Both | 0 | 1990 | 2000 | -0.06 | -0.14 | 0.03 | p>0.05 | -1.65 (-1.73 - -1.57) |
|  |  | 1 | 2000 | 2006 | -0.68 | -0.93 | -0.44 | p<0.05 |  |
|  |  | 2 | 2006 | 2012 | -2.59 | -2.84 | -2.33 | p<0.05 |  |
|  |  | 3 | 2012 | 2021 | -3.41 | -3.55 | -3.28 | p<0.05 |  |
|  | Female | 0 | 1990 | 2000 | -0.09 | -0.17 | 0 | p<0.05 | -1.97 (-2.12 - -1.82) |
|  |  | 1 | 2000 | 2006 | -0.73 | -0.97 | -0.49 | p<0.05 |  |
|  |  | 2 | 2006 | 2012 | -3.06 | -3.32 | -2.81 | p<0.05 |  |
|  |  | 3 | 2012 | 2015 | -5.14 | -6.48 | -3.78 | p<0.05 |  |
|  |  | 4 | 2015 | 2021 | -3.59 | -3.87 | -3.31 | p<0.05 |  |
|  | Male | 0 | 1990 | 1999 | -0.03 | -0.14 | 0.08 | p>0.05 | -1.39 (-1.48 - -1.31) |
|  |  | 1 | 1999 | 2005 | -0.44 | -0.72 | -0.17 | p<0.05 |  |
|  |  | 2 | 2005 | 2013 | -2 | -2.17 | -1.83 | p<0.05 |  |
|  |  | 3 | 2013 | 2021 | -2.99 | -3.17 | -2.82 | p<0.05 |  |
|  |  |  |  |  |  |  |  |  |  |
| Prevalence |  |  |  |  |  |  |  |  |  |
|  | Both | 0 | 1990 | 1993 | 0.73 | 0.42 | 1.03 | p<0.05 | 1.37 (1.29 - 1.46) |
|  |  | 1 | 1993 | 1996 | 1.31 | 0.7 | 1.92 | p<0.05 |  |
|  |  | 2 | 1996 | 2000 | 2.34 | 2.05 | 2.63 | p<0.05 |  |
|  |  | 3 | 2000 | 2005 | 2.02 | 1.85 | 2.19 | p<0.05 |  |
|  |  | 4 | 2005 | 2013 | 1.54 | 1.47 | 1.61 | p<0.05 |  |
|  |  | 5 | 2013 | 2016 | 0.91 | 0.45 | 1.38 | p<0.05 |  |
|  |  | 6 | 2016 | 2021 | 0.4 | 0.3 | 0.51 | p<0.05 |  |
|  | Female | 0 | 1990 | 1993 | 0.6 | 0.3 | 0.9 | p<0.05 | 1.31 (1.23 - 1.39) |
|  |  | 1 | 1993 | 1996 | 1.24 | 0.63 | 1.85 | p<0.05 |  |
|  |  | 2 | 1996 | 2002 | 2.22 | 2.1 | 2.35 | p<0.05 |  |
|  |  | 3 | 2002 | 2008 | 1.77 | 1.65 | 1.88 | p<0.05 |  |
|  |  | 4 | 2008 | 2013 | 1.37 | 1.22 | 1.52 | p<0.05 |  |
|  |  | 5 | 2013 | 2016 | 0.81 | 0.36 | 1.26 | p<0.05 |  |
|  |  | 6 | 2016 | 2021 | 0.38 | 0.28 | 0.47 | p<0.05 |  |
|  | Male | 0 | 1990 | 1993 | 0.83 | 0.52 | 1.13 | p<0.05 | 1.42 (1.34 - 1.51) |
|  |  | 1 | 1993 | 1996 | 1.4 | 0.81 | 1.99 | p<0.05 |  |
|  |  | 2 | 1996 | 2000 | 2.39 | 2.1 | 2.67 | p<0.05 |  |
|  |  | 3 | 2000 | 2005 | 2.04 | 1.87 | 2.21 | p<0.05 |  |
|  |  | 4 | 2005 | 2014 | 1.56 | 1.5 | 1.61 | p<0.05 |  |
|  |  | 5 | 2014 | 2017 | 0.75 | 0.28 | 1.22 | p<0.05 |  |
|  |  | 6 | 2017 | 2021 | 0.38 | 0.23 | 0.53 | p<0.05 |  |
|  |  |  |  |  |  |  |  |  |  |
| DALYs |  |  |  |  |  |  |  |  |  |
|  | Both | 0 | 1990 | 1994 | -2.22 | -2.77 | -1.67 | p<0.05 | -5.95 (-6.09 - -5.81) |
|  |  | 1 | 1994 | 1999 | -5.69 | -6.12 | -5.26 | p<0.05 |  |
|  |  | 2 | 1999 | 2007 | -7.86 | -8 | -7.72 | p<0.05 |  |
|  |  | 3 | 2007 | 2011 | -7.02 | -7.52 | -6.53 | p<0.05 |  |
|  |  | 4 | 2011 | 2019 | -6.03 | -6.16 | -5.89 | p<0.05 |  |
|  |  | 5 | 2019 | 2021 | -3.65 | -4.91 | -2.38 | p<0.05 |  |
|  | Female | 0 | 1990 | 1996 | -3.38 | -4.21 | -2.54 | p<0.05 | -5.94 (-6.17 - -5.71) |
|  |  | 1 | 1996 | 2007 | -7.66 | -7.88 | -7.44 | p<0.05 |  |
|  |  | 2 | 2007 | 2019 | -6.02 | -6.16 | -5.87 | p<0.05 |  |
|  |  | 3 | 2019 | 2021 | -3.47 | -5.97 | -0.89 | p<0.05 |  |
|  | Male | 0 | 1990 | 1994 | -2.03 | -2.73 | -1.33 | p<0.05 | -5.98 (-6.15 - -5.81) |
|  |  | 1 | 1994 | 1999 | -5.57 | -6.18 | -4.95 | p<0.05 |  |
|  |  | 2 | 1999 | 2011 | -7.76 | -7.85 | -7.66 | p<0.05 |  |
|  |  | 3 | 2011 | 2019 | -6.02 | -6.2 | -5.83 | p<0.05 |  |
|  |  | 4 | 2019 | 2021 | -3.78 | -5.59 | -1.94 | p<0.05 |  |
|  |  |  |  |  |  |  |  |  |  |
| YLDs |  |  |  |  |  |  |  |  |  |
|  | Both | 0 | 1990 | 1993 | 0.6 | 0.38 | 0.83 | p<0.05 | 1.06 (1.00 - 1.11) |
|  |  | 1 | 1993 | 1996 | 1.09 | 0.63 | 1.54 | p<0.05 |  |
|  |  | 2 | 1996 | 2000 | 1.93 | 1.7 | 2.16 | p<0.05 |  |
|  |  | 3 | 2000 | 2005 | 1.58 | 1.44 | 1.73 | p<0.05 |  |
|  |  | 4 | 2005 | 2014 | 0.99 | 0.94 | 1.04 | p<0.05 |  |
|  |  | 5 | 2014 | 2021 | 0.45 | 0.39 | 0.51 | p<0.05 |  |
|  | Female | 0 | 1990 | 1993 | 0.49 | 0.3 | 0.68 | p<0.05 | 1.01 (0.96 - 1.05) |
|  |  | 1 | 1993 | 1996 | 1.01 | 0.63 | 1.4 | p<0.05 |  |
|  |  | 2 | 1996 | 2001 | 1.86 | 1.73 | 1.98 | p<0.05 |  |
|  |  | 3 | 2001 | 2006 | 1.42 | 1.3 | 1.55 | p<0.05 |  |
|  |  | 4 | 2006 | 2014 | 0.91 | 0.86 | 0.97 | p<0.05 |  |
|  |  | 5 | 2014 | 2021 | 0.43 | 0.38 | 0.48 | p<0.05 |  |
|  | Male | 0 | 1990 | 1995 | 0.85 | 0.73 | 0.97 | p<0.05 | 1.10 (1.07 - 1.13) |
|  |  | 1 | 1995 | 2004 | 1.8 | 1.74 | 1.86 | p<0.05 |  |
|  |  | 2 | 2004 | 2014 | 1.05 | 1 | 1.1 | p<0.05 |  |
|  |  | 3 | 2014 | 2021 | 0.46 | 0.39 | 0.53 | p<0.05 |  |
|  |  |  |  |  |  |  |  |  |  |
| YLLs |  |  |  |  |  |  |  |  |  |
|  | Both | 0 | 1990 | 1994 | -2.35 | -3.76 | -0.91 | p<0.05 | -7.27 (-7.53 - -7.01) |
|  |  | 1 | 1994 | 1999 | -6.03 | -7.13 | -4.91 | p<0.05 |  |
|  |  | 2 | 1999 | 2010 | -8.78 | -9 | -8.55 | p<0.05 |  |
|  |  | 3 | 2010 | 2021 | -8.05 | -8.28 | -7.83 | p<0.05 |  |
|  | Female | 0 | 1990 | 1994 | -2.76 | -4.25 | -1.24 | p<0.05 | -7.48 (-7.84 - -7.12) |
|  |  | 1 | 1994 | 1999 | -6.55 | -7.69 | -5.4 | p<0.05 |  |
|  |  | 2 | 1999 | 2007 | -9.07 | -9.4 | -8.74 | p<0.05 |  |
|  |  | 3 | 2007 | 2015 | -7.97 | -8.26 | -7.68 | p<0.05 |  |
|  |  | 4 | 2015 | 2019 | -9.7 | -11.01 | -8.38 | p<0.05 |  |
|  |  | 5 | 2019 | 2021 | -6.17 | -9.3 | -2.93 | p<0.05 |  |
|  | Male | 0 | 1990 | 1994 | -1.97 | -3.18 | -0.75 | p<0.05 | -7.12 (-7.33 - -6.90) |
|  |  | 1 | 1994 | 2000 | -6.16 | -6.89 | -5.43 | p<0.05 |  |
|  |  | 2 | 2000 | 2011 | -8.85 | -9.05 | -8.65 | p<0.05 |  |
|  |  | 3 | 2011 | 2021 | -7.76 | -7.99 | -7.52 | p<0.05 |  |

**Table S7** Joinpoint regression analysis of trends in age-standardized rates for neonatal preterm birth in China, 1990-2021

| Measure | sex | Segment | Segment.Start | Segment.End | APC | lower | upper | P.Value | AAPC |
| --- | --- | --- | --- | --- | --- | --- | --- | --- | --- |
| Death |  |  |  |  |  |  |  |  |  |
|  | Both | 0 | 1990 | 1996 | -1.48 | -1.51 | -1.45 | p<0.05 | -0.74 (-0.76 - -0.72) |
|  |  | 1 | 1996 | 1999 | -2 | -2.16 | -1.84 | p<0.05 |  |
|  |  | 2 | 1999 | 2003 | -1.24 | -1.32 | -1.16 | p<0.05 |  |
|  |  | 3 | 2003 | 2009 | -0.74 | -0.77 | -0.7 | p<0.05 |  |
|  |  | 4 | 2009 | 2013 | -0.07 | -0.15 | 0 | p>0.05 |  |
|  |  | 5 | 2013 | 2021 | 0.19 | 0.18 | 0.21 | p<0.05 |  |
|  | Female | 0 | 1990 | 1996 | -1.23 | -1.26 | -1.2 | p<0.05 | -0.65 (-0.68 - -0.62) |
|  |  | 1 | 1996 | 1999 | -1.52 | -1.69 | -1.35 | p<0.05 |  |
|  |  | 2 | 1999 | 2004 | -1.19 | -1.24 | -1.14 | p<0.05 |  |
|  |  | 3 | 2004 | 2009 | -0.73 | -0.78 | -0.68 | p<0.05 |  |
|  |  | 4 | 2009 | 2012 | -0.1 | -0.27 | 0.07 | p>0.05 |  |
|  |  | 5 | 2012 | 2015 | 0.08 | -0.07 | 0.24 | p>0.05 |  |
|  |  | 6 | 2015 | 2021 | 0.25 | 0.23 | 0.28 | p<0.05 |  |
|  | Male | 0 | 1990 | 1996 | -1.67 | -1.7 | -1.63 | p<0.05 | -0.82 (-0.84 - -0.79) |
|  |  | 1 | 1996 | 1999 | -2.35 | -2.52 | -2.17 | p<0.05 |  |
|  |  | 2 | 1999 | 2003 | -1.24 | -1.32 | -1.16 | p<0.05 |  |
|  |  | 3 | 2003 | 2009 | -0.69 | -0.73 | -0.65 | p<0.05 |  |
|  |  | 4 | 2009 | 2012 | -0.13 | -0.3 | 0.04 | p>0.05 |  |
|  |  | 5 | 2012 | 2021 | 0.15 | 0.13 | 0.16 | p<0.05 |  |
|  |  |  |  |  |  |  |  |  |  |
|  |  |  |  |  |  |  |  |  |  |
| Incidence |  |  |  |  |  |  |  |  |  |
|  | Both | 0 | 1990 | 1996 | -1.48 | -1.51 | -1.45 | p<0.05 | -0.74 (-0.76 - -0.72) |
|  |  | 1 | 1996 | 1999 | -2 | -2.16 | -1.84 | p<0.05 |  |
|  |  | 2 | 1999 | 2003 | -1.24 | -1.32 | -1.16 | p<0.05 |  |
|  |  | 3 | 2003 | 2009 | -0.74 | -0.77 | -0.7 | p<0.05 |  |
|  |  | 4 | 2009 | 2013 | -0.07 | -0.15 | 0 | p>0.05 |  |
|  |  | 5 | 2013 | 2021 | 0.19 | 0.18 | 0.21 | p<0.05 |  |
|  | Female | 0 | 1990 | 1996 | -1.23 | -1.26 | -1.2 | p<0.05 | -0.65 (-0.68 - -0.62) |
|  |  | 1 | 1996 | 1999 | -1.52 | -1.69 | -1.35 | p<0.05 |  |
|  |  | 2 | 1999 | 2004 | -1.19 | -1.24 | -1.14 | p<0.05 |  |
|  |  | 3 | 2004 | 2009 | -0.73 | -0.78 | -0.68 | p<0.05 |  |
|  |  | 4 | 2009 | 2012 | -0.1 | -0.27 | 0.07 | p>0.05 |  |
|  |  | 5 | 2012 | 2015 | 0.08 | -0.07 | 0.24 | p>0.05 |  |
|  |  | 6 | 2015 | 2021 | 0.25 | 0.23 | 0.28 | p<0.05 |  |
|  | Male | 0 | 1990 | 1996 | -1.67 | -1.7 | -1.63 | p<0.05 | -0.82 (-0.84 - -0.79) |
|  |  | 1 | 1996 | 1999 | -2.35 | -2.52 | -2.17 | p<0.05 |  |
|  |  | 2 | 1999 | 2003 | -1.24 | -1.32 | -1.16 | p<0.05 |  |
|  |  | 3 | 2003 | 2009 | -0.69 | -0.73 | -0.65 | p<0.05 |  |
|  |  | 4 | 2009 | 2012 | -0.13 | -0.3 | 0.04 | p>0.05 |  |
|  |  | 5 | 2012 | 2021 | 0.15 | 0.13 | 0.16 | p<0.05 |  |
|  |  |  |  |  |  |  |  |  |  |
| Prevalence |  |  |  |  |  |  |  |  |  |
|  | Both | 0 | 1990 | 1996 | -1.48 | -1.51 | -1.45 | p<0.05 | -0.74 (-0.76 - -0.72) |
|  |  | 1 | 1996 | 1999 | -2 | -2.16 | -1.84 | p<0.05 |  |
|  |  | 2 | 1999 | 2003 | -1.24 | -1.32 | -1.16 | p<0.05 |  |
|  |  | 3 | 2003 | 2009 | -0.74 | -0.77 | -0.7 | p<0.05 |  |
|  |  | 4 | 2009 | 2013 | -0.07 | -0.15 | 0 | p>0.05 |  |
|  |  | 5 | 2013 | 2021 | 0.19 | 0.18 | 0.21 | p<0.05 |  |
|  | Female | 0 | 1990 | 1996 | -1.23 | -1.26 | -1.2 | p<0.05 | -0.65 (-0.68 - -0.62) |
|  |  | 1 | 1996 | 1999 | -1.52 | -1.69 | -1.35 | p<0.05 |  |
|  |  | 2 | 1999 | 2004 | -1.19 | -1.24 | -1.14 | p<0.05 |  |
|  |  | 3 | 2004 | 2009 | -0.73 | -0.78 | -0.68 | p<0.05 |  |
|  |  | 4 | 2009 | 2012 | -0.1 | -0.27 | 0.07 | p>0.05 |  |
|  |  | 5 | 2012 | 2015 | 0.08 | -0.07 | 0.24 | p>0.05 |  |
|  |  | 6 | 2015 | 2021 | 0.25 | 0.23 | 0.28 | p<0.05 |  |
|  | Male | 0 | 1990 | 1996 | -1.67 | -1.7 | -1.63 | p<0.05 | -0.82 (-0.84 - -0.79) |
|  |  | 1 | 1996 | 1999 | -2.35 | -2.52 | -2.17 | p<0.05 |  |
|  |  | 2 | 1999 | 2003 | -1.24 | -1.32 | -1.16 | p<0.05 |  |
|  |  | 3 | 2003 | 2009 | -0.69 | -0.73 | -0.65 | p<0.05 |  |
|  |  | 4 | 2009 | 2012 | -0.13 | -0.3 | 0.04 | p>0.05 |  |
|  |  | 5 | 2012 | 2021 | 0.15 | 0.13 | 0.16 | p<0.05 |  |
|  |  |  |  |  |  |  |  |  |  |
| DALYs |  |  |  |  |  |  |  |  |  |
|  | Both | 0 | 1990 | 1993 | -1.06 | -1.12 | -1 | p<0.05 | -0.22 (-0.24 - -0.20) |
|  |  | 1 | 1993 | 1996 | -0.5 | -0.62 | -0.38 | p<0.05 |  |
|  |  | 2 | 1996 | 2000 | 0.46 | 0.4 | 0.52 | p<0.05 |  |
|  |  | 3 | 2000 | 2005 | -0.06 | -0.1 | -0.02 | p<0.05 |  |
|  |  | 4 | 2005 | 2016 | -0.35 | -0.36 | -0.34 | p<0.05 |  |
|  |  | 5 | 2016 | 2019 | -0.19 | -0.31 | -0.07 | p<0.05 |  |
|  |  | 6 | 2019 | 2021 | 0.44 | 0.32 | 0.56 | p<0.05 |  |
|  | Female | 0 | 1990 | 1993 | -1.01 | -1.1 | -0.92 | p<0.05 | -0.20 (-0.22 - -0.17) |
|  |  | 1 | 1993 | 1996 | -0.37 | -0.55 | -0.19 | p<0.05 |  |
|  |  | 2 | 1996 | 2000 | 0.73 | 0.64 | 0.82 | p<0.05 |  |
|  |  | 3 | 2000 | 2006 | -0.03 | -0.07 | 0.01 | p>0.05 |  |
|  |  | 4 | 2006 | 2016 | -0.45 | -0.47 | -0.44 | p<0.05 |  |
|  |  | 5 | 2016 | 2019 | -0.26 | -0.43 | -0.08 | p<0.05 |  |
|  |  | 6 | 2019 | 2021 | 0.35 | 0.17 | 0.53 | p<0.05 |  |
|  | Male | 0 | 1990 | 1993 | -1.12 | -1.21 | -1.03 | p<0.05 | -0.24 (-0.27 - -0.22) |
|  |  | 1 | 1993 | 1996 | -0.62 | -0.8 | -0.44 | p<0.05 |  |
|  |  | 2 | 1996 | 2000 | 0.25 | 0.16 | 0.34 | p<0.05 |  |
|  |  | 3 | 2000 | 2004 | -0.1 | -0.19 | -0.02 | p<0.05 |  |
|  |  | 4 | 2004 | 2015 | -0.29 | -0.3 | -0.27 | p<0.05 |  |
|  |  | 5 | 2015 | 2019 | -0.19 | -0.28 | -0.1 | p<0.05 |  |
|  |  | 6 | 2019 | 2021 | 0.5 | 0.33 | 0.68 | p<0.05 |  |
|  |  |  |  |  |  |  |  |  |  |
| YLDs |  |  |  |  |  |  |  |  |  |
|  | Both | 0 | 1990 | 1993 | -1.06 | -1.12 | -1 | p<0.05 | -0.22 (-0.24 - -0.20) |
|  |  | 1 | 1993 | 1996 | -0.5 | -0.62 | -0.38 | p<0.05 |  |
|  |  | 2 | 1996 | 2000 | 0.46 | 0.4 | 0.52 | p<0.05 |  |
|  |  | 3 | 2000 | 2005 | -0.06 | -0.1 | -0.02 | p<0.05 |  |
|  |  | 4 | 2005 | 2016 | -0.35 | -0.36 | -0.34 | p<0.05 |  |
|  |  | 5 | 2016 | 2019 | -0.19 | -0.31 | -0.07 | p<0.05 |  |
|  |  | 6 | 2019 | 2021 | 0.44 | 0.32 | 0.56 | p<0.05 |  |
|  | Female | 0 | 1990 | 1993 | -1.01 | -1.1 | -0.92 | p<0.05 | -0.20 (-0.22 - -0.17) |
|  |  | 1 | 1993 | 1996 | -0.37 | -0.55 | -0.19 | p<0.05 |  |
|  |  | 2 | 1996 | 2000 | 0.73 | 0.64 | 0.82 | p<0.05 |  |
|  |  | 3 | 2000 | 2006 | -0.03 | -0.07 | 0.01 | p>0.05 |  |
|  |  | 4 | 2006 | 2016 | -0.45 | -0.47 | -0.44 | p<0.05 |  |
|  |  | 5 | 2016 | 2019 | -0.26 | -0.43 | -0.08 | p<0.05 |  |
|  |  | 6 | 2019 | 2021 | 0.35 | 0.17 | 0.53 | p<0.05 |  |
|  | Male | 0 | 1990 | 1993 | -1.12 | -1.21 | -1.03 | p<0.05 | -0.24 (-0.27 - -0.22) |
|  |  | 1 | 1993 | 1996 | -0.62 | -0.8 | -0.44 | p<0.05 |  |
|  |  | 2 | 1996 | 2000 | 0.25 | 0.16 | 0.34 | p<0.05 |  |
|  |  | 3 | 2000 | 2004 | -0.1 | -0.19 | -0.02 | p<0.05 |  |
|  |  | 4 | 2004 | 2015 | -0.29 | -0.3 | -0.27 | p<0.05 |  |
|  |  | 5 | 2015 | 2019 | -0.19 | -0.28 | -0.1 | p<0.05 |  |
|  |  | 6 | 2019 | 2021 | 0.5 | 0.33 | 0.68 | p<0.05 |  |
|  |  |  |  |  |  |  |  |  |  |
| YLLs |  |  |  |  |  |  |  |  |  |
|  | Both | 0 | 1990 | 1992 | 0.28 | -1.75 | 2.36 | p>0.05 | -4.50 (-4.73 - -4.27) |
|  |  | 1 | 1992 | 1999 | -2.11 | -2.41 | -1.8 | p<0.05 |  |
|  |  | 2 | 1999 | 2009 | -4.57 | -4.7 | -4.45 | p<0.05 |  |
|  |  | 3 | 2009 | 2013 | -6.13 | -6.72 | -5.54 | p<0.05 |  |
|  |  | 4 | 2013 | 2016 | -7.49 | -8.61 | -6.36 | p<0.05 |  |
|  |  | 5 | 2016 | 2019 | -5.64 | -6.95 | -4.32 | p<0.05 |  |
|  |  | 6 | 2019 | 2021 | -7.48 | -8.9 | -6.05 | p<0.05 |  |
|  | Female | 0 | 1990 | 1993 | -0.2 | -1.15 | 0.76 | p>0.05 | -4.47 (-4.67 - -4.26) |
|  |  | 1 | 1993 | 2000 | -2.29 | -2.58 | -2 | p<0.05 |  |
|  |  | 2 | 2000 | 2009 | -4.7 | -4.86 | -4.55 | p<0.05 |  |
|  |  | 3 | 2009 | 2013 | -6.29 | -6.85 | -5.72 | p<0.05 |  |
|  |  | 4 | 2013 | 2016 | -7.49 | -8.58 | -6.38 | p<0.05 |  |
|  |  | 5 | 2016 | 2019 | -5.6 | -6.8 | -4.37 | p<0.05 |  |
|  |  | 6 | 2019 | 2021 | -7.15 | -8.46 | -5.82 | p<0.05 |  |
|  | Male | 0 | 1990 | 1993 | -0.6 | -1.77 | 0.58 | p>0.05 | -4.55 (-4.79 - -4.31) |
|  |  | 1 | 1993 | 1999 | -2.38 | -2.84 | -1.92 | p<0.05 |  |
|  |  | 2 | 1999 | 2009 | -4.54 | -4.68 | -4.4 | p<0.05 |  |
|  |  | 3 | 2009 | 2013 | -5.98 | -6.62 | -5.34 | p<0.05 |  |
|  |  | 4 | 2013 | 2016 | -7.51 | -8.73 | -6.27 | p<0.05 |  |
|  |  | 5 | 2016 | 2019 | -5.67 | -7.06 | -4.25 | p<0.05 |  |
|  |  | 6 | 2019 | 2021 | -7.71 | -9.27 | -6.12 | p<0.05 |  |

**Table S8** joinpoint regression analysis of trends in age-standardized rates for neonatal sepsis and other neonatal infections in China, 1990-2021

| Measure | sex | Segment | Segment.Start | Segment.End | APC | lower | upper | P.Value | AAPC |
| --- | --- | --- | --- | --- | --- | --- | --- | --- | --- |
| Deaths |  |  |  |  |  |  |  |  |  |
|  | Both | 0 | 1990 | 1996 | -1.11 | -1.67 | -0.55 | p<0.05 | -3.46 (-3.71 - -3.21) |
|  |  | 1 | 1996 | 2001 | -4.48 | -5.31 | -3.65 | p<0.05 |  |
|  |  | 2 | 2001 | 2006 | -6.88 | -7.64 | -6.11 | p<0.05 |  |
|  |  | 3 | 2006 | 2015 | -1.96 | -2.27 | -1.65 | p<0.05 |  |
|  |  | 4 | 2015 | 2021 | -4.26 | -4.92 | -3.6 | p<0.05 |  |
|  | Female | 0 | 1990 | 1996 | -0.99 | -1.62 | -0.36 | p<0.05 | -3.19 (-3.50 - -2.87) |
|  |  | 1 | 1996 | 2002 | -4.68 | -5.44 | -3.91 | p<0.05 |  |
|  |  | 2 | 2002 | 2006 | -8.11 | -9.65 | -6.54 | p<0.05 |  |
|  |  | 3 | 2006 | 2014 | -0.43 | -0.88 | 0.03 | p<0.05 |  |
|  |  | 4 | 2014 | 2021 | -3.98 | -4.61 | -3.35 | p<0.05 |  |
|  | Male | 0 | 1990 | 1996 | -1.32 | -1.86 | -0.77 | p<0.05 | -3.62 (-3.91 - -3.33) |
|  |  | 1 | 1996 | 2000 | -3.97 | -5.28 | -2.64 | p<0.05 |  |
|  |  | 2 | 2000 | 2005 | -6.74 | -7.49 | -5.98 | p<0.05 |  |
|  |  | 3 | 2005 | 2011 | -3.28 | -3.81 | -2.75 | p<0.05 |  |
|  |  | 4 | 2011 | 2015 | -2.14 | -3.32 | -0.95 | p<0.05 |  |
|  |  | 5 | 2015 | 2021 | -4.33 | -4.88 | -3.78 | p<0.05 |  |
|  |  |  |  |  |  |  |  |  |  |
| Incidence |  |  |  |  |  |  |  |  |  |
|  | Both | 0 | 1990 | 2002 | -0.98 | -1 | -0.96 | p<0.05 | -1.43 (-1.47 - -1.38) |
|  |  | 1 | 2002 | 2008 | -1.1 | -1.17 | -1.03 | p<0.05 |  |
|  |  | 2 | 2008 | 2011 | -1.81 | -2.11 | -1.51 | p<0.05 |  |
|  |  | 3 | 2011 | 2014 | -3.79 | -4.06 | -3.51 | p<0.05 |  |
|  |  | 4 | 2014 | 2018 | -1.44 | -1.56 | -1.31 | p<0.05 |  |
|  |  | 5 | 2018 | 2021 | -1.06 | -1.15 | -0.97 | p<0.05 |  |
|  | Female | 0 | 1990 | 2010 | -1.2 | -1.22 | -1.19 | p<0.05 | -1.51 (-1.55 - -1.47) |
|  |  | 1 | 2010 | 2014 | -3.66 | -3.84 | -3.49 | p<0.05 |  |
|  |  | 2 | 2014 | 2017 | -1.37 | -1.71 | -1.03 | p<0.05 |  |
|  |  | 3 | 2017 | 2021 | -0.97 | -1.05 | -0.89 | p<0.05 |  |
|  | Male | 0 | 1990 | 2002 | -0.89 | -0.91 | -0.87 | p<0.05 | -1.39 (-1.43 - -1.34) |
|  |  | 1 | 2002 | 2008 | -1.05 | -1.12 | -0.98 | p<0.05 |  |
|  |  | 2 | 2008 | 2011 | -1.8 | -2.09 | -1.51 | p<0.05 |  |
|  |  | 3 | 2011 | 2014 | -3.63 | -3.89 | -3.37 | p<0.05 |  |
|  |  | 4 | 2014 | 2018 | -1.55 | -1.66 | -1.44 | p<0.05 |  |
|  |  | 5 | 2018 | 2021 | -1.12 | -1.21 | -1.02 | p<0.05 |  |
|  |  |  |  |  |  |  |  |  |  |
| Prevalence |  |  |  |  |  |  |  |  |  |
|  | Both | 0 | 1990 | 1997 | 1.03 | 0.88 | 1.17 | p<0.05 | 0.40 (0.30 - 0.50) |
|  |  | 1 | 1997 | 2005 | 1.87 | 1.72 | 2.01 | p<0.05 |  |
|  |  | 2 | 2005 | 2010 | 0.38 | 0.03 | 0.72 | p<0.05 |  |
|  |  | 3 | 2010 | 2014 | -2.18 | -2.73 | -1.63 | p<0.05 |  |
|  |  | 4 | 2014 | 2021 | -0.39 | -0.49 | -0.28 | p<0.05 |  |
|  | Female | 0 | 1990 | 1995 | 0.76 | 0.6 | 0.92 | p<0.05 | 0.18 (0.06 - 0.30) |
|  |  | 1 | 1995 | 2000 | 1.25 | 1.02 | 1.48 | p<0.05 |  |
|  |  | 2 | 2000 | 2004 | 2.13 | 1.76 | 2.51 | p<0.05 |  |
|  |  | 3 | 2004 | 2008 | 0.58 | 0.2 | 0.96 | p<0.05 |  |
|  |  | 4 | 2008 | 2011 | -0.81 | -1.56 | -0.05 | p<0.05 |  |
|  |  | 5 | 2011 | 2014 | -2.92 | -3.68 | -2.15 | p<0.05 |  |
|  |  | 6 | 2014 | 2021 | -0.53 | -0.61 | -0.46 | p<0.05 |  |
|  | Male | 0 | 1990 | 1996 | 1.05 | 0.91 | 1.19 | p<0.05 | 0.50 (0.41 - 0.60) |
|  |  | 1 | 1996 | 2005 | 1.89 | 1.8 | 1.98 | p<0.05 |  |
|  |  | 2 | 2005 | 2010 | 0.52 | 0.26 | 0.78 | p<0.05 |  |
|  |  | 3 | 2010 | 2015 | -1.79 | -2.06 | -1.53 | p<0.05 |  |
|  |  | 4 | 2015 | 2018 | 0.27 | -0.45 | 0.99 | p>0.05 |  |
|  |  | 5 | 2018 | 2021 | -0.63 | -0.87 | -0.39 | p<0.05 |  |
|  |  |  |  |  |  |  |  |  |  |
| DALYs |  |  |  |  |  |  |  |  |  |
|  | Both | 0 | 1990 | 1996 | -0.78 | -1.11 | -0.46 | p<0.05 | -2.44 (-2.61 - -2.27) |
|  |  | 1 | 1996 | 2000 | -3.08 | -3.91 | -2.24 | p<0.05 |  |
|  |  | 2 | 2000 | 2006 | -4.4 | -4.83 | -3.96 | p<0.05 |  |
|  |  | 3 | 2006 | 2014 | -1.58 | -1.89 | -1.27 | p<0.05 |  |
|  |  | 4 | 2014 | 2021 | -2.77 | -3.07 | -2.47 | p<0.05 |  |
|  | Female | 0 | 1990 | 1996 | -0.66 | -1.09 | -0.23 | p<0.05 | -2.29 (-2.53 - -2.04) |
|  |  | 1 | 1996 | 2002 | -3.34 | -3.87 | -2.81 | p<0.05 |  |
|  |  | 2 | 2002 | 2006 | -5.03 | -6.33 | -3.7 | p<0.05 |  |
|  |  | 3 | 2006 | 2014 | -0.75 | -1.16 | -0.33 | p<0.05 |  |
|  |  | 4 | 2014 | 2021 | -2.91 | -3.3 | -2.52 | p<0.05 |  |
|  | Male | 0 | 1990 | 1996 | -0.89 | -1.19 | -0.58 | p<0.05 | -2.54 (-2.69 - -2.38) |
|  |  | 1 | 1996 | 2000 | -2.96 | -3.73 | -2.2 | p<0.05 |  |
|  |  | 2 | 2000 | 2005 | -4.61 | -5.12 | -4.09 | p<0.05 |  |
|  |  | 3 | 2005 | 2016 | -2.19 | -2.33 | -2.04 | p<0.05 |  |
|  |  | 4 | 2016 | 2021 | -2.83 | -3.23 | -2.43 | p<0.05 |  |
|  |  |  |  |  |  |  |  |  |  |
| YLDs |  |  |  |  |  |  |  |  |  |
|  | Both | 0 | 1990 | 1997 | 1.45 | 1.26 | 1.65 | p<0.05 | 0.68 (0.56 - 0.80) |
|  |  | 1 | 1997 | 2005 | 2.48 | 2.29 | 2.66 | p<0.05 |  |
|  |  | 2 | 2005 | 2010 | 0.25 | -0.16 | 0.66 | p>0.05 |  |
|  |  | 3 | 2010 | 2014 | -2.02 | -2.63 | -1.41 | p<0.05 |  |
|  |  | 4 | 2014 | 2021 | -0.24 | -0.37 | -0.12 | p<0.05 |  |
|  | Female | 0 | 1990 | 1995 | 1.09 | 0.92 | 1.26 | p<0.05 | 0.43 (0.32 - 0.54) |
|  |  | 1 | 1995 | 2000 | 1.7 | 1.46 | 1.94 | p<0.05 |  |
|  |  | 2 | 2000 | 2004 | 2.88 | 2.52 | 3.24 | p<0.05 |  |
|  |  | 3 | 2004 | 2007 | 0.79 | 0.1 | 1.5 | p<0.05 |  |
|  |  | 4 | 2007 | 2011 | -0.71 | -1.05 | -0.37 | p<0.05 |  |
|  |  | 5 | 2011 | 2014 | -2.66 | -3.32 | -2 | p<0.05 |  |
|  |  | 6 | 2014 | 2021 | -0.46 | -0.53 | -0.4 | p<0.05 |  |
|  | Male | 0 | 1990 | 1996 | 1.55 | 1.35 | 1.75 | p<0.05 | 0.82 (0.70 - 0.93) |
|  |  | 1 | 1996 | 2005 | 2.48 | 2.36 | 2.61 | p<0.05 |  |
|  |  | 2 | 2005 | 2010 | 0.46 | 0.12 | 0.8 | p<0.05 |  |
|  |  | 3 | 2010 | 2015 | -1.68 | -1.99 | -1.36 | p<0.05 |  |
|  |  | 4 | 2015 | 2018 | 0.55 | -0.33 | 1.43 | p>0.05 |  |
|  |  | 5 | 2018 | 2021 | -0.52 | -0.84 | -0.21 | p<0.05 |  |
|  |  |  |  |  |  |  |  |  |  |
| YLLs |  |  |  |  |  |  |  |  |  |
|  | Both | 0 | 1990 | 1996 | -1.11 | -1.66 | -0.55 | p<0.05 | -3.46 (-3.71 - -3.21) |
|  |  | 1 | 1996 | 2001 | -4.48 | -5.31 | -3.65 | p<0.05 |  |
|  |  | 2 | 2001 | 2006 | -6.88 | -7.64 | -6.11 | p<0.05 |  |
|  |  | 3 | 2006 | 2015 | -1.96 | -2.27 | -1.65 | p<0.05 |  |
|  |  | 4 | 2015 | 2021 | -4.26 | -4.92 | -3.6 | p<0.05 |  |
|  | Female | 0 | 1990 | 1996 | -0.99 | -1.62 | -0.36 | p<0.05 | -3.19 (-3.50 - -2.87) |
|  |  | 1 | 1996 | 2002 | -4.68 | -5.44 | -3.91 | p<0.05 |  |
|  |  | 2 | 2002 | 2006 | -8.11 | -9.65 | -6.54 | p<0.05 |  |
|  |  | 3 | 2006 | 2014 | -0.42 | -0.88 | 0.04 | p>0.05 |  |
|  |  | 4 | 2014 | 2021 | -3.98 | -4.61 | -3.35 | p<0.05 |  |
|  | Male | 0 | 1990 | 1996 | -1.32 | -1.86 | -0.77 | p<0.05 | -3.62 (-3.91 - -3.33) |
|  |  | 1 | 1996 | 2000 | -3.97 | -5.28 | -2.64 | p<0.05 |  |
|  |  | 2 | 2000 | 2005 | -6.74 | -7.49 | -5.99 | p<0.05 |  |
|  |  | 3 | 2005 | 2011 | -3.28 | -3.81 | -2.75 | p<0.05 |  |
|  |  | 4 | 2011 | 2015 | -2.14 | -3.32 | -0.95 | p<0.05 |  |
|  |  | 5 | 2015 | 2021 | -4.33 | -4.88 | -3.79 | p<0.05 |  |

**Table S9** Points estimated and 95% uncertainty interval of attributable number and age-standardized rate of risk factors for neonatal encephalopathy due to birth asphyxia and trauma by gender in China, 2021

| Measures | All risk factors | Low birth weight | Short gestation | Ambient particulate matter pollution | Household air pollution from solid fuels |
| --- | --- | --- | --- | --- | --- |
| Attributable number in thousands |  |  |  |  |  |
| Deaths |  |  |  |  |  |
| Both | 4.4 (3.6, 5.5) | 3.2 (2.6, 4.0) | 0.1 (0.0, 0.2) | 0.8 (0.4, 1.2) | 0.3 (0.1, 0.7) |
| Female | 1.7 (1.3, 2.2) | 1.4 (1.1, 1.8) | 0.0 (0.0, 0.1) | 0.3 (0.1, 0.4) | 0.1 (0.0, 0.3) |
| Male | 2.7 (2.1, 3.5) | 1.8 (1.4, 2.4) | 0.1 (0.0, 0.2) | 0.5 (0.2, 0.8) | 0.2 (0.0, 0.4) |
| DALYs |  |  |  |  |  |
| Both | 398.3 (319.6, 491.8) | 289.7 (232.5, 358.4) | 8.9 (3.2, 17.5) | 70.4 (37.0, 104.3) | 25.7 (6.9, 59.8) |
| Female | 155.0 (118.3, 199.5) | 123.7 (94.6, 157.6) | 2.5 (0.5, 6.7) | 26.4 (12.5, 39.9) | 9.7 (2.7, 23.2) |
| Male | 243.3 (185.3, 311.4) | 166.1 (122.0, 216.4) | 6.4 (1.8, 14.1) | 44.0 (21.8, 68.4) | 16.0 (4.1, 38.5) |
| YLDs |  |  |  |  |  |
| Both | 0.1 (0.1, 0.1) | NA | NA | 0.1 (0.0, 0.1) | 0.0 (0.0, 0.0) |
| Female | 0.0 (0.0, 0.0) | NA | NA | 0.0 (0.0, 0.0) | 0.0 (0.0, 0.0) |
| Male | 0.1 (0.0, 0.1) | NA | NA | 0.0 (0.0, 0.1) | 0.0 (0.0, 0.0) |
| YLLs |  |  |  |  |  |
| Both | 398.3 (319.5, 491.6) | 289.7 (232.5, 358.4) | 8.9 (3.2, 17.5) | 70.3 (37.0, 104.2) | 25.7 (6.9, 59.7) |
| Female | 155.0 (118.3, 199.5) | 123.7 (94.6, 157.6) | 2.5 (0.5, 6.7) | 26.4 (12.5, 39.8) | 9.7 (2.7, 23.2) |
| Male | 243.3 (185.2, 311.3) | 166.1 (122.0, 216.4) | 6.4 (1.8, 14.1) | 44.0 (21.8, 68.4) | 16.0 (4.1, 38.5) |
| Attributable age-standardized rate per 100,000 |  |  |  |  |  |
| Deaths |  |  |  |  |  |
| Both | 0.8 (0.7, 1.0) | 0.6 (0.5, 0.8) | 0.0 (0.0, 0.0) | 0.1 (0.1, 0.2) | 0.1 (0.0, 0.1) |
| Female | 0.7 (0.5, 0.9) | 0.6 (0.4, 0.7) | 0.0 (0.0, 0.0) | 0.1 (0.1, 0.2) | 0.0 (0.0, 0.1) |
| Male | 0.9 (0.7, 1.2) | 0.6 (0.5, 0.8) | 0.0 (0.0, 0.1) | 0.2 (0.1, 0.3) | 0.1 (0.0, 0.1) |
| DALYs |  |  |  |  |  |
| Both | 75.0 (60.2, 92.7) | 54.6 (43.8, 67.5) | 1.7 (0.6, 3.3) | 13.3 (7.0, 19.7) | 4.8 (1.3, 11.3) |
| Female | 63.2 (48.2, 81.4) | 50.4 (38.6, 64.3) | 1.0 (0.2, 2.7) | 10.8 (5.1, 16.3) | 4.0 (1.1, 9.5) |
| Male | 85.2 (64.9, 109.0) | 58.1 (42.7, 75.8) | 2.2 (0.6, 4.9) | 15.4 (7.6, 24.0) | 5.6 (1.4, 13.5) |
| YLDs |  |  |  |  |  |
| Both | 0.0 (0.0, 0.0) | NA | NA | 0.0 (0.0, 0.0) | 0.0 (0.0, 0.0) |
| Female | 0.0 (0.0, 0.0) | NA | NA | 0.0 (0.0, 0.0) | 0.0 (0.0, 0.0) |
| Male | 0.0 (0.0, 0.0) | NA | NA | 0.0 (0.0, 0.0) | 0.0 (0.0, 0.0) |
| YLLs |  |  |  |  |  |
| Both | 75.0 (60.2, 92.6) | 54.6 (43.8, 67.5) | 1.7 (0.6, 3.3) | 13.3 (7.0, 19.6) | 4.8 (1.3, 11.3) |
| Female | 63.2 (48.2, 81.4) | 50.4 (38.6, 64.3) | 1.0 (0.2, 2.7) | 10.8 (5.1, 16.3) | 4.0 (1.1, 9.5) |
| Male | 85.2 (64.9, 109.0) | 58.1 (42.7, 75.8) | 2.2 (0.6, 4.9) | 15.4 (7.6, 23.9) | 5.6 (1.4, 13.5) |

**Table S10** Points estimated and 95% uncertainty interval of attributable number and age-standardized rate of risk factors for hemolytic disease and other neonatal jaundice by gender in China, 2021

| Measures | All risk factors | Low birth weight | Short gestation | Ambient particulate matter pollution | Household air pollution from solid fuels |
| --- | --- | --- | --- | --- | --- |
| Attributable number in thousands |  |  |  |  |  |
| Deaths |  |  |  |  |  |
| Both | 0.2 (0.1, 0.2) | 0.2 (0.1, 0.2) | 0.0 (0.0, 0.0) | 0.0 (0.0, 0.0) | 0.0 (0.0, 0.0) |
| Female | 0.1 (0.0, 0.1) | 0.1 (0.0, 0.1) | 0.0 (0.0, 0.0) | 0.0 (0.0, 0.0) | 0.0 (0.0, 0.0) |
| Male | 0.1 (0.1, 0.2) | 0.1 (0.1, 0.1) | 0.0 (0.0, 0.0) | 0.0 (0.0, 0.0) | 0.0 (0.0, 0.0) |
| DALYs |  |  |  |  |  |
| Both | 17.4 (13.0, 22.4) | 13.5 (10.3, 17.6) | 0.6 (0.3, 1.1) | 2.8 (1.4, 4.3) | 1.2 (0.4, 2.7) |
| Female | 5.5 (3.7, 7.8) | 4.6 (3.1, 6.3) | 0.1 (0.0, 0.3) | 0.9 (0.4, 1.4) | 0.4 (0.1, 0.8) |
| Male | 11.9 (8.6, 15.8) | 8.9 (6.5, 11.8) | 0.5 (0.2, 0.9) | 1.9 (1.0, 3.0) | 0.8 (0.2, 1.9) |
| YLDs |  |  |  |  |  |
| Both | 0.0 (0.0, 0.0) | NA | NA | 0.0 (0.0, 0.0) | 0.0 (0.0, 0.0) |
| Female | 0.0 (0.0, 0.0) | NA | NA | 0.0 (0.0, 0.0) | 0.0 (0.0, 0.0) |
| Male | 0.0 (0.0, 0.0) | NA | NA | 0.0 (0.0, 0.0) | 0.0 (0.0, 0.0) |
| YLLs |  |  |  |  |  |
| Both | 17.3 (13.0, 22.4) | 13.5 (10.3, 17.6) | 0.6 (0.3, 1.1) | 2.8 (1.4, 4.3) | 1.2 (0.4, 2.7) |
| Female | 5.5 (3.7, 7.8) | 4.6 (3.1, 6.3) | 0.1 (0.0, 0.3) | 0.9 (0.4, 1.4) | 0.4 (0.1, 0.8) |
| Male | 11.9 (8.6, 15.8) | 8.9 (6.5, 11.8) | 0.5 (0.2, 0.9) | 1.9 (1.0, 3.0) | 0.8 (0.2, 1.9) |
| Attributable age-standardized rate per 100,000 |  |  |  |  |  |
| Deaths |  |  |  |  |  |
| Both | 0.0 (0.0, 0.0) | 0.0 (0.0, 0.0) | 0.0 (0.0, 0.0) | 0.0 (0.0, 0.0) | 0.0 (0.0, 0.0) |
| Female | 0.0 (0.0, 0.0) | 0.0 (0.0, 0.0) | 0.0 (0.0, 0.0) | 0.0 (0.0, 0.0) | 0.0 (0.0, 0.0) |
| Male | 0.0 (0.0, 0.1) | 0.0 (0.0, 0.0) | 0.0 (0.0, 0.0) | 0.0 (0.0, 0.0) | 0.0 (0.0, 0.0) |
| DALYs |  |  |  |  |  |
| Both | 3.3 (2.4, 4.2) | 2.5 (1.9, 3.3) | 0.1 (0.1, 0.2) | 0.5 (0.3, 0.8) | 0.2 (0.1, 0.5) |
| Female | 2.2 (1.5, 3.2) | 1.8 (1.3, 2.6) | 0.1 (0.0, 0.1) | 0.4 (0.2, 0.6) | 0.2 (0.0, 0.3) |
| Male | 4.1 (3.0, 5.5) | 3.1 (2.3, 4.1) | 0.2 (0.1, 0.3) | 0.7 (0.3, 1.1) | 0.3 (0.1, 0.7) |
| YLDs |  |  |  |  |  |
| Both | 0.0 (0.0, 0.0) | NA | NA | 0.0 (0.0, 0.0) | 0.0 (0.0, 0.0) |
| Female | 0.0 (0.0, 0.0) | NA | NA | 0.0 (0.0, 0.0) | 0.0 (0.0, 0.0) |
| Male | 0.0 (0.0, 0.0) | NA | NA | 0.0 (0.0, 0.0) | 0.0 (0.0, 0.0) |
| YLLs |  |  |  |  |  |
| Both | 3.3 (2.4, 4.2) | 2.5 (1.9, 3.3) | 0.1 (0.1, 0.2) | 0.5 (0.3, 0.8) | 0.2 (0.1, 0.5) |
| Female | 2.2 (1.5, 3.1) | 1.8 (1.3, 2.6) | 0.1 (0.0, 0.1) | 0.3 (0.2, 0.6) | 0.2 (0.0, 0.3) |
| Male | 4.1 (3.0, 5.5) | 3.1 (2.3, 4.1) | 0.2 (0.1, 0.3) | 0.7 (0.3, 1.1) | 0.3 (0.1, 0.7) |

**Table S11** Points estimated and 95% uncertainty interval of attributable number and age-standardized rate of risk factors for neonatal preterm birth by gender in China, 2021

| Measures | All risk factors | Low birth weight | Short gestation | Ambient particulate matter pollution | Household air pollution from solid fuels |
| --- | --- | --- | --- | --- | --- |
| Attributable number in thousands |  |  |  |  |  |
| Deaths |  |  |  |  |  |
| Both | 14.2 (11.9, 17.0) | 14.2 (11.9, 17.0) | 14.2 (11.9, 17.0) | 2.4 (1.3, 3.4) | 0.8 (0.2, 1.9) |
| Female | 5.8 (4.6, 6.9) | 5.8 (4.6, 6.9) | 5.8 (4.6, 6.9) | 1.0 (0.5, 1.4) | 0.3 (0.1, 0.8) |
| Male | 8.5 (6.8, 10.3) | 8.5 (6.8, 10.3) | 8.5 (6.8, 10.3) | 1.4 (0.8, 2.1) | 0.5 (0.1, 1.1) |
| DALYs |  |  |  |  |  |
| Both | 2113.3 (1783.7, 2470.4) | 2113.3 (1783.7, 2470.4) | 2113.3 (1783.7, 2470.4) | 215.0 (116.5, 305.7) | 69.5 (17.7, 170.7) |
| Female | 893.8 (749.4, 1051.4) | 893.8 (749.4, 1051.4) | 893.8 (749.4, 1051.4) | 87.2 (45.8, 124.6) | 27.8 (7.2, 68.8) |
| Male | 1219.5 (1026.5, 1447.6) | 1219.5 (1026.5, 1447.6) | 1219.5 (1026.5, 1447.6) | 127.8 (68.7, 187.0) | 41.6 (10.4, 100.6) |
| YLDs |  |  |  |  |  |
| Both | 832.8 (595.3, 1066.1) | 832.8 (595.3, 1066.1) | 832.8 (595.3, 1066.1) | 0.2 (0.1, 0.3) | 0.1 (0.0, 0.2) |
| Female | 375.1 (267.0, 484.8) | 375.1 (267.0, 484.8) | 375.1 (267.0, 484.8) | 0.1 (0.0, 0.1) | 0.0 (0.0, 0.1) |
| Male | 457.6 (327.5, 585.2) | 457.6 (327.5, 585.2) | 457.6 (327.5, 585.2) | 0.1 (0.1, 0.2) | 0.0 (0.0, 0.1) |
| YLLs |  |  |  |  |  |
| Both | 1280.5 (1067.8, 1527.9) | 1280.5 (1067.8, 1527.9) | 1280.5 (1067.8, 1527.9) | 214.8 (116.4, 305.4) | 69.4 (17.7, 170.6) |
| Female | 518.6 (416.7, 618.1) | 518.6 (416.7, 618.1) | 518.6 (416.7, 618.1) | 87.1 (45.8, 124.5) | 27.8 (7.2, 68.7) |
| Male | 761.9 (612.4, 926.2) | 761.9 (612.4, 926.2) | 761.9 (612.4, 926.2) | 127.7 (68.6, 186.9) | 41.6 (10.3, 100.6) |
| Attributable age-standardized rate per 100,000 |  |  |  |  |  |
| Deaths |  |  |  |  |  |
| Both | 2.7 (2.2, 3.2) | 2.7 (2.2, 3.2) | 2.7 (2.2, 3.2) | 0.4 (0.2, 0.6) | 0.1 (0.0, 0.4) |
| Female | 2.3 (1.9, 2.8) | 2.3 (1.9, 2.8) | 2.3 (1.9, 2.8) | 0.4 (0.2, 0.6) | 0.1 (0.0, 0.3) |
| Male | 2.9 (2.4, 3.6) | 2.9 (2.4, 3.6) | 2.9 (2.4, 3.6) | 0.5 (0.3, 0.7) | 0.2 (0.0, 0.4) |
| DALYs |  |  |  |  |  |
| Both | 301.5 (260.4, 350.9) | 301.5 (260.4, 350.9) | 301.5 (260.4, 350.9) | 40.5 (21.9, 57.6) | 13.1 (3.3, 32.2) |
| Female | 266.9 (225.9, 311.4) | 266.9 (225.9, 311.4) | 266.9 (225.9, 311.4) | 35.5 (18.7, 50.8) | 11.4 (2.9, 28.0) |
| Male | 331.3 (278.6, 393.6) | 331.3 (278.6, 393.6) | 331.3 (278.6, 393.6) | 44.8 (24.0, 65.5) | 14.6 (3.6, 35.2) |
| YLDs |  |  |  |  |  |
| Both | 63.1 (45.2, 80.7) | 63.1 (45.2, 80.7) | 63.1 (45.2, 80.7) | 0.0 (0.0, 0.1) | 0.0 (0.0, 0.0) |
| Female | 57.6 (40.9, 74.2) | 57.6 (40.9, 74.2) | 57.6 (40.9, 74.2) | 0.0 (0.0, 0.1) | 0.0 (0.0, 0.0) |
| Male | 67.9 (48.7, 86.8) | 67.9 (48.7, 86.8) | 67.9 (48.7, 86.8) | 0.0 (0.0, 0.1) | 0.0 (0.0, 0.0) |
| YLLs |  |  |  |  |  |
| Both | 238.4 (199.0, 284.3) | 238.4 (199.0, 284.3) | 238.4 (199.0, 284.3) | 40.5 (21.9, 57.5) | 13.1 (3.3, 32.1) |
| Female | 209.3 (168.1, 249.2) | 209.3 (168.1, 249.2) | 209.3 (168.1, 249.2) | 35.5 (18.7, 50.8) | 11.3 (2.9, 28.0) |
| Male | 263.5 (211.8, 320.0) | 263.5 (211.8, 320.0) | 263.5 (211.8, 320.0) | 44.7 (24.0, 65.4) | 14.6 (3.6, 35.2) |

Table S12 Points estimated and 95% uncertainty interval of attributable number and age-standardized rate of risk factors for neonatal sepsis and other neonatal infections by gender in China, 2021

| Measures | All risk factors | Low birth weight | Short gestation | Ambient particulate matter pollution | Household air pollution from solid fuels |
| --- | --- | --- | --- | --- | --- |
| Attributable number in thousands |  |  |  |  |  |
| Deaths |  |  |  |  |  |
| Both | 0.5 (0.4, 0.7) | 0.4 (0.3, 0.5) | 0.0 (0.0, 0.0) | 0.1 (0.1, 0.1) | 0.0 (0.0, 0.1) |
| Female | 0.2 (0.1, 0.3) | 0.2 (0.1, 0.2) | 0.0 (0.0, 0.0) | 0.0 (0.0, 0.1) | 0.0 (0.0, 0.0) |
| Male | 0.3 (0.3, 0.4) | 0.3 (0.2, 0.3) | 0.0 (0.0, 0.0) | 0.1 (0.0, 0.1) | 0.0 (0.0, 0.0) |
| DALYs |  |  |  |  |  |
| Both | 49.0 (36.2, 61.9) | 38.0 (28.0, 47.6) | 1.7 (0.9, 3.0) | 8.7 (4.9, 12.6) | 2.4 (0.6, 6.5) |
| Female | 17.9 (12.0, 23.1) | 14.9 (9.9, 19.1) | 0.4 (0.1, 0.8) | 3.1 (1.6, 4.7) | 0.8 (0.2, 2.3) |
| Male | 31.1 (23.4, 40.4) | 23.0 (17.2, 29.6) | 1.3 (0.6, 2.4) | 5.6 (3.1, 8.4) | 1.6 (0.4, 4.3) |
| YLDs |  |  |  |  |  |
| Both | 0.0 (0.0, 0.0) | NA | NA | 0.0 (0.0, 0.0) | 0.0 (0.0, 0.0) |
| Female | 0.0 (0.0, 0.0) | NA | NA | 0.0 (0.0, 0.0) | 0.0 (0.0, 0.0) |
| Male | 0.0 (0.0, 0.0) | NA | NA | 0.0 (0.0, 0.0) | 0.0 (0.0, 0.0) |
| YLLs |  |  |  |  |  |
| Both | 49.0 (36.2, 61.9) | 38.0 (28.0, 47.6) | 1.7 (0.9, 3.0) | 8.7 (4.9, 12.6) | 2.4 (0.6, 6.5) |
| Female | 17.9 (12.0, 23.1) | 14.9 (9.9, 19.1) | 0.4 (0.1, 0.8) | 3.1 (1.6, 4.7) | 0.8 (0.2, 2.3) |
| Male | 31.1 (23.3, 40.4) | 23.0 (17.2, 29.6) | 1.3 (0.6, 2.4) | 5.6 (3.1, 8.4) | 1.6 (0.4, 4.3) |
| Attributable age-standardized rate per 100,000 |  |  |  |  |  |
| Deaths |  |  |  |  |  |
| Both | 0.1 (0.1, 0.1) | 0.1 (0.1, 0.1) | 0.0 (0.0, 0.0) | 0.0 (0.0, 0.0) | 0.0 (0.0, 0.0) |
| Female | 0.1 (0.1, 0.1) | 0.1 (0.0, 0.1) | 0.0 (0.0, 0.0) | 0.0 (0.0, 0.0) | 0.0 (0.0, 0.0) |
| Male | 0.1 (0.1, 0.2) | 0.1 (0.1, 0.1) | 0.0 (0.0, 0.0) | 0.0 (0.0, 0.0) | 0.0 (0.0, 0.0) |
| DALYs |  |  |  |  |  |
| Both | 9.2 (6.8, 11.6) | 7.1 (5.3, 8.9) | 0.3 (0.2, 0.6) | 1.6 (0.9, 2.4) | 0.5 (0.1, 1.2) |
| Female | 7.3 (4.9, 9.4) | 6.1 (4.0, 7.8) | 0.2 (0.1, 0.3) | 1.3 (0.6, 1.9) | 0.3 (0.1, 0.9) |
| Male | 10.9 (8.1, 14.1) | 8.0 (6.0, 10.3) | 0.5 (0.2, 0.8) | 2.0 (1.1, 2.9) | 0.6 (0.1, 1.5) |
| YLDs |  |  |  |  |  |
| Both | 0.0 (0.0, 0.0) | NA | NA | 0.0 (0.0, 0.0) | 0.0 (0.0, 0.0) |
| Female | 0.0 (0.0, 0.0) | NA | NA | 0.0 (0.0, 0.0) | 0.0 (0.0, 0.0) |
| Male | 0.0 (0.0, 0.0) | NA | NA | 0.0 (0.0, 0.0) | 0.0 (0.0, 0.0) |
| YLLs |  |  |  |  |  |
| Both | 9.2 (6.8, 11.6) | 7.1 (5.3, 8.9) | 0.3 (0.2, 0.6) | 1.6 (0.9, 2.4) | 0.5 (0.1, 1.2) |
| Female | 7.3 (4.9, 9.4) | 6.1 (4.0, 7.8) | 0.2 (0.1, 0.3) | 1.3 (0.6, 1.9) | 0.3 (0.1, 0.9) |
| Male | 10.9 (8.1, 14.1) | 8.0 (6.0, 10.3) | 0.5 (0.2, 0.8) | 2.0 (1.1, 2.9) | 0.6 (0.1, 1.5) |

Table S13 Prediction of age-standardized rate (per 100,000) of all six measures for neonatal encephalopathy due to birth asphyxia and trauma for the next 10 years according to ARIMA models with 95% confidence interval in China

| Measures | 2022 | 2023 | 2024 | 2025 | 2026 | 2027 | 2028 | 2029 | 2030 | 2031 |
| --- | --- | --- | --- | --- | --- | --- | --- | --- | --- | --- |
| Deaths |  |  |  |  |  |  |  |  |  |  |
| Both | 1.6 (1.5 1.7) | 1.4 (1.2 1.7) | 1.3 (0.9 1.6) | 1.1 (0.6 1.7) | 1.0 (0.3 1.7) | 0.9 (0.0 1.8) | 0.7 (-0.4 1.8) | 0.6 (-0.7 1.9) | 0.5 (-1.0 2.0) | 0.4 (-1.4 2.1) |
| Male | 1.7 (1.6 1.9) | 1.6 (1.3 1.8) | 1.4 (1.0 1.8) | 1.3 (0.7 1.8) | 1.1 (0.3 1.9) | 1.0 (0.0 2.0) | 0.8 (-0.4 2.0) | 0.7 (-0.8 2.1) | 0.5 (-1.2 2.2) | 0.4 (-1.5 2.4) |
| Female | 1.4 (1.3 1.5) | 1.3 (1.1 1.5) | 1.1 (0.8 1.5) | 1.0 (0.5 1.5) | 0.9 (0.3 1.5) | 0.8 (0.0 1.6) | 0.6 (-0.3 1.6) | 0.5 (-0.6 1.7) | 0.4 (-1.0 1.8) | 0.3 (-1.3 1.9) |
| Incidence |  |  |  |  |  |  |  |  |  |  |
| Both | 13.8 (13.7 14.0) | 13.7 (13.4 14.0) | 13.5 (13.0 14.0) | 13.4 (12.8 13.9) | 13.2 (12.6 13.9) | 13.1 (12.4 13.8) | 13.0 (12.3 13.8) | 12.9 (12.1 13.7) | 12.8 (11.9 13.6) | 12.6 (11.7 13.5) |
| Male | 16.7 (16.5 16.8) | 16.5 (16.1 16.8) | 16.2 (15.7 16.8) | 16.1 (15.4 16.7) | 15.9 (15.2 16.7) | 15.8 (15.0 16.6) | 15.7 (14.8 16.5) | 15.5 (14.6 16.4) | 15.4 (14.4 16.3) | 15.2 (14.2 16.2) |
| Female | 10.6 (10.5 10.7) | 10.5 (10.2 10.7) | 10.3 (9.9 10.7) | 10.2 (9.7 10.7) | 10.1 (9.5 10.7) | 10.0 (9.4 10.6) | 9.9 (9.2 10.6) | 9.8 (9.1 10.5) | 9.7 (8.9 10.4) | 9.6 (8.8 10.4) |
| Prevalence |  |  |  |  |  |  |  |  |  |  |
| Both | 329.9 (328.7 331.2) | 323.8 (319.4 328.2) | 318.1 (309.1 327.2) | 313.7 (299.3 328.1) | 309.9 (289.8 329.9) | 305.9 (279.8 331.9) | 301.5 (269.0 334.0) | 297.0 (257.6 336.4) | 292.6 (245.8 339.4) | 288.3 (233.7 342.8) |
| Male | 395.7 (394.3 397.1) | 391.1 (386.6 395.6) | 385.9 (377.1 394.8) | 381.8 (367.9 395.7) | 379.0 (359.9 398.1) | 377.0 (352.6 401.4) | 374.9 (345.1 404.6) | 372.2 (336.8 407.6) | 369.1 (327.6 410.5) | 365.8 (317.8 413.8) |
| Female | 259.5 (258.5 260.5) | 251.3 (247.4 255.2) | 242.4 (234.1 250.7) | 235.9 (222.3 249.6) | 232.0 (212.7 251.3) | 228.4 (203.5 253.3) | 223.0 (192.2 253.8) | 215.8 (178.4 253.1) | 208.2 (163.5 252.9) | 201.8 (149.1 254.5) |
| DALYs |  |  |  |  |  |  |  |  |  |  |
| Both | 218.7 (210.0 227.4) | 204.9 (185.6 224.1) | 191.5 (159.7 223.3) | 178.6 (132.6 224.6) | 166.0 (104.5 227.6) | 153.9 (75.6 232.1) | 142.1 (46.2 238.1) | 130.7 (16.2 245.2) | 119.7 (-14.1 253.5) | 109.0 (-44.8 262.8) |
| Male | 246.0 (236.2 255.9) | 231.0 (209.2 252.7) | 216.4 (180.5 252.4) | 202.4 (150.5 254.3) | 188.8 (119.4 258.3) | 175.7 (87.4 263.9) | 163.0 (54.9 271.1) | 150.7 (21.8 279.7) | 138.9 (-11.7 289.4) | 127.4 (-45.5 300.3) |
| Female | 187.6 (179.7 195.4) | 175.3 (157.9 192.6) | 163.3 (134.7 192.0) | 151.8 (110.4 193.2) | 140.6 (85.2 196.0) | 129.8 (59.3 200.2) | 119.3 (32.9 205.7) | 109.1 (6.0 212.2) | 99.3 (-21.2 219.8) | 89.7 (-48.7 228.2) |
| YLDs |  |  |  |  |  |  |  |  |  |  |
| Both | 74.7 (74.4 74.9) | 73.3 (72.4 74.2) | 72.0 (70.1 73.8) | 71.1 (68.2 74.0) | 70.5 (66.5 74.5) | 69.8 (64.7 74.9) | 68.9 (62.6 75.2) | 68.0 (60.4 75.6) | 67.2 (58.3 76.2) | 66.7 (56.4 77.0) |
| Male | 88.2 (87.9 88.6) | 87.9 (87.1 88.8) | 87.5 (85.9 89.1) | 87.1 (84.6 89.6) | 86.6 (83.1 90.2) | 86.2 (81.5 90.9) | 85.8 (79.9 91.7) | 85.4 (78.3 92.5) | 85.0 (76.6 93.5) | 84.7 (74.9 94.5) |
| Female | 60.7 (60.4 60.9) | 59.7 (58.8 60.7) | 58.8 (56.8 60.8) | 58.0 (54.7 61.2) | 57.3 (52.7 61.9) | 56.8 (50.8 62.7) | 56.3 (49.1 63.6) | 56.0 (47.4 64.6) | 55.7 (45.8 65.6) | 55.5 (44.4 66.6) |
| YLLs |  |  |  |  |  |  |  |  |  |  |
| Both | 143.1 (134.2 151.9) | 129.1 (109.5 148.7) | 115.6 (83.2 148.0) | 102.5 (55.6 149.4) | 89.8 (27.1 152.6) | 77.5 (-2.3 157.4) | 65.6 (-32.3 163.6) | 54.1 (-62.8 171.0) | 42.9 (-93.8 179.5) | 32.0 (-125.1 189.1) |
| Male | 157.5 (147.4 167.5) | 142.3 (120.1 164.4) | 127.5 (91.0 164.1) | 113.3 (60.5 166.1) | 99.5 (28.9 170.2) | 86.2 (-3.6 176.0) | 73.3 (-36.8 183.4) | 60.8 (-70.5 192.1) | 48.7 (-104.7 202.2) | 37.1 (-139.2 213.3) |
| Female | 126.3 (118.3 134.3) | 114.0 (96.3 131.6) | 102.0 (72.7 131.2) | 90.3 (48.1 132.6) | 79.1 (22.5 135.7) | 68.2 (-3.8 140.1) | 57.6 (-30.7 145.8) | 47.3 (-58.1 152.7) | 37.4 (-85.8 160.5) | 27.7 (-113.9 169.3) |

Table S14 Prediction of age-standardized rate (per 100,000) of all six measures for hemolytic disease and other neonatal jaundice for the next 10 years according to ARIMA models with 95% confidence interval in China

| Measures | 2022 | 2023 | 2024 | 2025 | 2026 | 2027 | 2028 | 2029 | 2030 | 2031 |
| --- | --- | --- | --- | --- | --- | --- | --- | --- | --- | --- |
| Deaths |  |  |  |  |  |  |  |  |  |  |
| Both | 0.1 (0.1 0.1) | 0.1 (0.1 0.1) | 0.1 (0.1 0.1) | 0.1 (0.1 0.1) | 0.1 (0.0 0.1) | 0.1 (0.0 0.2) | 0.1 (0.0 0.2) | 0.1 (0.0 0.2) | 0.1 (0.1 0.3) | 0.1 (-0.1 0.3) |
| Male | 0.1 (0.1 0.1) | 0.1 (0.1 0.1) | 0.1 (0.0 0.1) | 0.1 (0.0 0.1) | 0.1 (0.0 0.1) | 0.0 (0.0 0.1) | 0.0 (0.1 0.1) | 0.0 (-0.1 0.1) | 0.0 (-0.2 0.1) | 0.0 (-0.2 0.2) |
| Female | 0.1 (0.1 0.1) | 0.1 (0.1 0.1) | 0.1 (0.0 0.1) | 0.1 (0.0 0.1) | 0.1 (0.0 0.1) | 0.1 (0.0 0.1) | 0.1 (0.0 0.2) | 0.1 (0.0 0.2) | 0.1 (0.1 0.2) | 0.1 (0.1 0.3) |
| Incidence |  |  |  |  |  |  |  |  |  |  |
| Both | 1.2 (1.2 1.2) | 1.1 (1.1 1.2) | 1.1 (1.1 1.2) | 1.1 (1.0 1.1) | 1.0 (0.9 1.1) | 1.0 (0.9 1.1) | 1.0 (0.8 1.1) | 0.9 (0.8 1.1) | 0.9 (0.7 1.1) | 0.8 (0.6 1.1) |
| Male | 1.3 (1.3 1.3) | 1.3 (1.2 1.3) | 1.2 (1.2 1.3) | 1.2 (1.1 1.3) | 1.2 (1.1 1.2) | 1.1 (1.0 1.2) | 1.1 (1.0 1.2) | 1.0 (0.9 1.2) | 1.0 (0.8 1.2) | 1.0 (0.8 1.1) |
| Female | 1.0 (1.0 1.0) | 1.0 (1.0 1.0) | 1.0 (0.9 1.0) | 0.9 (0.8 1.0) | 0.9 (0.8 1.0) | 0.9 (0.7 1.0) | 0.8 (0.7 1.0) | 0.8 (0.6 1.0) | 0.8 (0.5 1.0) | 0.7 (0.5 1.0) |
| Prevalence |  |  |  |  |  |  |  |  |  |  |
| Both | 12.8 (12.8 12.9) | 13.0 (12.9 13.0) | 13.1 (12.9 13.2) | 13.2 (13.0 13.4) | 13.3 (13.1 13.6) | 13.5 (13.1 13.8) | 13.6 (13.2 13.9) | 13.7 (13.3 14.1) | 13.8 (13.3 14.3) | 13.9 (13.4 14.5) |
| Male | 13.2 (13.2 13.2) | 13.3 (13.2 13.4) | 13.5 (13.3 13.6) | 13.6 (13.4 13.8) | 13.7 (13.5 14.0) | 13.9 (13.6 14.2) | 14.0 (13.6 14.4) | 14.1 (13.7 14.6) | 14.3 (13.8 14.8) | 14.4 (13.9 15.0) |
| Female | 12.4 (12.3 12.4) | 12.5 (12.4 12.6) | 12.6 (12.5 12.7) | 12.7 (12.5 12.9) | 12.8 (12.6 13.1) | 12.9 (12.7 13.2) | 13.1 (12.7 13.4) | 13.2 (12.8 13.6) | 13.3 (12.8 13.7) | 13.4 (12.9 13.9) |
| DALYs |  |  |  |  |  |  |  |  |  |  |
| Both | 13.4 (12.8 13.9) | 13.2 (12.2 14.3) | 13.2 (11.3 15.2) | 13.3 (10.0 16.5) | 13.4 (8.4 18.4) | 13.6 (6.4 20.8) | 13.9 (3.9 23.8) | 14.2 (1.0 27.4) | 14.6 (-2.5 31.6) | 15.0 (-6.3 36.3) |
| Male | 14.7 (13.9 15.4) | 13.5 (11.8 15.3) | 12.4 (9.5 15.3) | 11.2 (6.9 15.5) | 10.1 (4.3 15.8) | 8.9 (1.5 16.3) | 7.7 (-1.5 17.0) | 6.6 (-4.5 17.7) | 5.4 (-7.7 18.6) | 4.3 (-11.0 19.5) |
| Female | 10.7 (10.2 11.2) | 10.5 (9.5 11.5) | 10.5 (8.7 12.2) | 10.5 (7.7 13.2) | 10.6 (6.5 14.7) | 10.7 (4.9 16.5) | 11.0 (3.1 18.8) | 11.3 (1.0 21.6) | 11.7 (-1.4 24.8) | 12.1 (-4.2 28.4) |
| YLDs |  |  |  |  |  |  |  |  |  |  |
| Both | 5.1 (5.1 5.1) | 5.3 (5.2 5.3) | 5.4 (5.3 5.5) | 5.5 (5.4 5.6) | 5.6 (5.4 5.7) | 5.6 (5.4 5.7) | 5.6 (5.4 5.8) | 5.6 (5.4 5.8) | 5.6 (5.4 5.8) | 5.7 (5.5 5.9) |
| Male | 5.2 (5.2 5.2) | 5.4 (5.3 5.4) | 5.5 (5.4 5.5) | 5.6 (5.5 5.7) | 5.6 (5.5 5.8) | 5.7 (5.5 5.8) | 5.7 (5.5 5.9) | 5.7 (5.5 5.9) | 5.7 (5.6 5.9) | 5.8 (5.6 6.0) |
| Female | 4.9 (5.0 5.0) | 5.1 (5.1 5.1) | 5.2 (5.1 5.3) | 5.3 (5.2 5.4) | 5.4 (5.2 5.5) | 5.4 (5.3 5.6) | 5.5 (5.3 5.7) | 5.5 (5.3 5.7) | 5.5 (5.3 5.7) | 5.5 (5.3 5.7) |
| YLLs |  |  |  |  |  |  |  |  |  |  |
| Both | 8.1 (7.6 8.7) | 7.8 (6.9 8.8) | 7.6 (6.0 9.3) | 7.6 (4.9 10.3) | 7.6 (3.5 11.7) | 7.8 (1.9 13.6) | 8.0 (0.0 16.1) | 8.4 (-2.4 19.2) | 8.9 (-5.0 22.8) | 9.5 (-8.1 27.1) |
| Male | 9.5 (8.7 10.3) | 8.3 (6.5 10.0) | 7.0 (4.1 10.0) | 5.8 (1.5 10.1) | 4.6 (-1.2 10.4) | 3.4 (-4.1 10.9) | 2.2 (-7.1 11.5) | 0.9 (-10.3 12.2) | -0.3 (-13.5 13.0) | -1.5 (-16.9 13.9) |
| Female | 5.8 (5.3 6.3) | 5.6 (4.7 6.6) | 5.5 (3.9 7.2) | 5.5 (2.9 8.2) | 5.6 (1.6 9.6) | 5.8 (0.1 11.4) | 6.0 (-1.7 13.7) | 6.3 (-3.8 16.4) | 6.7 (-6.2 19.5) | 7.1 (-8.9 23.2) |

Table S15 Prediction of age-standardized rate (per 100,000) of all six measures for neonatal preterm birth for the next 10 years according to ARIMA models with 95% confidence interval in China

| Measures | 2022 | 2023 | 2024 | 2025 | 2026 | 2027 | 2028 | 2029 | 2030 | 2031 |
| --- | --- | --- | --- | --- | --- | --- | --- | --- | --- | --- |
| Deaths |  |  |  |  |  |  |  |  |  |  |
| Both | 2.4 (2.3 2.5) | 2.2 (2.0 2.4) | 2.0 (1.7 2.3) | 1.8 (1.3 2.2) | 1.5 (1.0 2.1) | 1.3 (0.6 2.0) | 1.1 (0.3 1.9) | 0.9 (0.0 1.8) | 0.6 (-0.4 1.7) | 0.4 (-0.7 1.5) |
| Male | 2.7 (2.6 2.8) | 2.4 (2.2 2.7) | 2.2 (1.9 2.5) | 1.9 (1.5 2.4) | 1.7 (1.1 2.3) | 1.4 (0.7 2.1) | 1.2 (0.4 2.0) | 0.9 (0.0 1.9) | 0.7 (-0.4 1.7) | 0.4 (-0.8 1.6) |
| Female | 2.1 (2.0 2.2) | 1.9 (1.8 2.1) | 1.8 (1.5 2.0) | 1.6 (1.2 2.0) | 1.4 (0.8 1.9) | 1.2 (0.5 1.9) | 1.0 (0.1 1.9) | 0.8 (-0.2 1.8) | 0.6 (-0.6 1.8) | 0.4 (-1.0 1.8) |
| Incidence |  |  |  |  |  |  |  |  |  |  |
| Both | 146.0 (144.6 147.4) | 145.8 (142.3 149.2) | 145.5 (140.0 151.1) | 145.3 (137.5 153.2) | 145.1 (134.8 155.4) | 144.9 (131.9 157.9) | 144.6 (128.8 160.5) | 144.4 (125.6 163.3) | 144.2 (122.2 166.2) | 144.0 (118.6 169.3) |
| Male | 162.2 (160.6 163.8) | 161.6 (157.6 165.7) | 161.1 (154.7 167.6) | 160.6 (151.5 169.7) | 160.1 (148.0 172.1) | 159.5 (144.3 174.7) | 159.0 (140.5 177.5) | 158.5 (136.4 180.6) | 157.9 (132.1 183.8) | 157.4 (127.6 187.2) |
| Female | 127.0 (125.7 128.3) | 126.8 (123.9 129.7) | 126.6 (121.7 131.5) | 126.4 (119.2 133.6) | 126.2 (116.4 135.9) | 126.0 (113.4 138.5) | 125.8 (110.2 141.4) | 125.6 (106.8 144.4) | 125.4 (103.2 147.6) | 125.2 (99.4 150.9) |
| Prevalence |  |  |  |  |  |  |  |  |  |  |
| Both | 649.6 (648.5 650.8) | 653.9 (650.3 657.5) | 658.1 (651.5 664.8) | 662.4 (652.1 672.7) | 666.6 (652.2 681.0) | 670.9 (651.9 689.8) | 675.1 (651.3 699.0) | 679.4 (650.2 708.6) | 683.6 (648.8 718.5) | 687.9 (647.1 728.7) |
| Male | 728.8 (727.4 730.1) | 734.6 (729.8 739.3) | 740.4 (730.9 749.9) | 746.2 (731.0 761.5) | 752.1 (730.3 773.9) | 757.9 (728.8 787.0) | 763.7 (726.7 800.8) | 769.6 (724.0 815.2) | 775.4 (720.6 830.1) | 781.2 (716.8 845.6) |
| Female | 563.6 (562.7 564.5) | 567.8 (565.1 570.6) | 572.1 (567.0 577.2) | 576.3 (568.4 584.2) | 580.6 (569.5 591.6) | 584.8 (570.3 599.4) | 589.1 (570.7 607.4) | 593.3 (570.9 615.7) | 597.6 (570.8 624.3) | 601.8 (570.5 633.1) |
| DALYs |  |  |  |  |  |  |  |  |  |  |
| Both | 282.0 (273.4 290.6) | 262.2 (244.3 280.2) | 242.3 (214.3 270.4) | 222.3 (183.8 260.8) | 202.2 (153.2 251.2) | 182.0 (122.6 241.4) | 161.7 (92.2 231.3) | 141.4 (62.0 220.9) | 121.1 (32.0 210.1) | 100.7 (2.3 199.0) |
| Male | 309.8 (300.5 319.0) | 287.7 (268.6 306.8) | 265.5 (235.7 295.3) | 243.0 (202.2 283.8) | 220.3 (168.6 272.1) | 197.6 (134.9 260.2) | 174.6 (101.4 247.8) | 151.6 (68.2 235.1) | 128.6 (35.2 222.0) | 105.4 (2.5 208.4) |
| Female | 250.1 (242.1 258.1) | 233.2 (217.3 249.0) | 216.2 (190.7 241.8) | 199.3 (162.7 235.9) | 182.4 (133.4 231.3) | 165.4 (103.0 227.8) | 148.5 (71.6 225.3) | 131.5 (39.2 223.8) | 114.6 (5.9 223.3) | 97.7 (-28.2 223.5) |
| YLDs |  |  |  |  |  |  |  |  |  |  |
| Both | 63.6 (63.5 63.8) | 64.3 (64.0 64.6) | 64.9 (64.3 65.6) | 65.6 (64.5 66.6) | 66.1 (64.6 67.5) | 66.5 (64.6 68.4) | 66.8 (64.4 69.2) | 66.9 (64.1 69.8) | 67.0 (63.8 70.3) | 67.0 (63.3 70.7) |
| Male | 68.6 (68.5 68.8) | 69.6 (69.2 70.0) | 70.7 (69.9 71.5) | 71.8 (70.6 73.1) | 73.0 (71.1 74.9) | 74.2 (71.6 76.7) | 75.3 (71.9 78.7) | 76.4 (72.2 80.7) | 77.6 (72.4 82.7) | 78.7 (72.5 84.8) |
| Female | 58.0 (57.9 58.1) | 58.3 (58.0 58.7) | 58.7 (58.1 59.3) | 59.0 (58.0 60.0) | 59.2 (57.9 60.6) | 59.4 (57.6 61.1) | 59.4 (57.3 61.6) | 59.5 (57.0 61.9) | 59.4 (56.6 62.2) | 59.4 (56.3 62.5) |
| YLLs |  |  |  |  |  |  |  |  |  |  |
| Both | 218.7 (210.0 227.3) | 198.7 (180.7 216.8) | 178.7 (150.5 207.0) | 158.7 (119.8 197.6) | 138.6 (89.0 188.3) | 118.5 (58.2 178.8) | 98.4 (27.6 169.2) | 78.3 (-2.8 159.3) | 58.1 (-32.9 149.1) | 37.9 (-62.7 138.5) |
| Male | 241.5 (232.3 250.8) | 219.3 (200.1 238.5) | 197.0 (166.9 227.0) | 174.5 (133.2 215.7) | 151.9 (99.4 204.4) | 129.2 (65.5 192.9) | 106.5 (31.9 181.1) | 83.7 (-1.5 168.9) | 60.8 (-34.7 156.4) | 37.9 (-67.6 143.5) |
| Female | 192.3 (184.3 200.3) | 175.1 (159.1 191.0) | 157.9 (132.2 183.6) | 140.7 (103.9 177.6) | 123.6 (74.3 172.8) | 106.4 (43.6 169.1) | 89.2 (11.9 166.5) | 72.0 (-20.8 164.9) | 54.9 (-54.3 164.1) | 37.7 (-88.9 164.3) |

Table S16 Prediction of age-standardized rate (per 100,000) of all six measures for neonatal sepsis and other neonatal infections for the next 10 years according to ARIMA models with 95% confidence interval in China

| Measures | 2022 | 2023 | 2024 | 2025 | 2026 | 2027 | 2028 | 2029 | 2030 | 2031 |
| --- | --- | --- | --- | --- | --- | --- | --- | --- | --- | --- |
| Deaths |  |  |  |  |  |  |  |  |  |  |
| Both | 0.2 (0.2 0.2) | 0.2 (0.2 0.2) | 0.2 (0.2 0.2) | 0.2 (0.1 0.2) | 0.2 (0.1 0.2) | 0.2 (0.1 0.2) | 0.1 (0.1 0.2) | 0.1 (0.1 0.2) | 0.1 (0.0 0.2) | 0.1 (0.0 0.2) |
| Male | 0.3 (0.3 0.3) | 0.2 (0.2 0.3) | 0.2 (0.2 0.3) | 0.2 (0.2 0.3) | 0.2 (0.1 0.2) | 0.2 (0.1 0.2) | 0.2 (0.1 0.2) | 0.1 (0.1 0.2) | 0.1 (0.0 0.2) | 0.1 (0.0 0.2) |
| Female | 0.2 (0.2 0.2) | 0.2 (0.2 0.2) | 0.2 (0.1 0.2) | 0.2 (0.1 0.2) | 0.1 (0.1 0.2) | 0.1 (0.1 0.2) | 0.1 (0.1 0.2) | 0.1 (0.0 0.2) | 0.1 (0.0 0.2) | 0.1 (0.0 0.2) |
| Incidence |  |  |  |  |  |  |  |  |  |  |
| Both | 16.6 (16.6 16.7) | 16.4 (16.2 16.6) | 16.2 (15.9 16.5) | 15.9 (15.4 16.4) | 15.6 (15.0 16.3) | 15.3 (14.5 16.1) | 15.0 (14.1 15.9) | 14.7 (13.7 15.7) | 14.4 (13.3 15.5) | 14.1 (12.9 15.2) |
| Male | 20.4 (20.4 20.5) | 20.2 (20.0 20.4) | 20.0 (19.6 20.4) | 19.7 (19.1 20.3) | 19.3 (18.5 20.1) | 19.0 (18.0 20.0) | 18.7 (17.5 19.8) | 18.3 (17.1 19.5) | 17.9 (16.6 19.3) | 17.6 (16.1 19.0) |
| Female | 12.2 (12.1 12.2) | 12.0 (11.9 12.1) | 11.8 (11.5 12.1) | 11.5 (11.1 11.9) | 11.3 (10.7 11.8) | 11.0 (10.4 11.6) | 10.7 (10.1 11.4) | 10.5 (9.8 11.6) | 10.2 (9.5 10.9) | 10.0 (9.2 10.7) |
| Prevalence |  |  |  |  |  |  |  |  |  |  |
| Both | 47.1 (46.9 47.4) | 47.8 (47.0 48.6) | 48.4 (46.9 49.9) | 49.1 (46.8 51.4) | 49.7 (46.5 53.0) | 50.4 (46.1 54.6) | 51.0 (45.7 56.4) | 51.7 (45.1 58.2) | 52.3 (44.5 60.2) | 53.0 (43.8 62.1) |
| Male | 56.8 (56.4 57.1) | 57.5 (56.5 58.6) | 58.3 (56.4 60.2) | 59.1 (56.2 62.0) | 59.8 (55.8 63.9) | 60.6 (55.3 65.9) | 61.4 (54.7 68.0) | 62.1 (54.0 70.3) | 62.9 (53.2 72.6) | 63.6 (52.3 75.0) |
| Female | 36.6 (36.4 36.7) | 37.4 (36.8 38.0) | 38.2 (36.9 39.5) | 39.0 (36.9 41.1) | 39.8 (36.8 42.8) | 40.6 (36.6 44.6) | 41.4 (36.3 46.5) | 42.2 (36.0 48.5) | 43.0 (35.5 50.7) | 43.8 (35.0 52.7) |
| DALYs |  |  |  |  |  |  |  |  |  |  |
| Both | 33.6 (32.8 34.5) | 32.3 (30.6 34.1) | 31.0 (28.7 33.4) | 29.7 (26.9 32.5) | 28.4 (25.2 31.6) | 27.1 (23.5 30.6) | 25.7 (21.9 29.6) | 24.4 (20.3 28.6) | 23.1 (18.7 27.5) | 21.8 (17.1 26.5) |
| Male | 39.9 (38.9 40.9) | 38.3 (36.4 40.3) | 36.8 (33.9 39.7) | 35.2 (31.5 39.0) | 33.7 (29.2 38.2) | 32.2 (27.0 37.4) | 30.6 (24.8 36.5) | 29.1 (22.6 35.6) | 27.6 (20.5 34.6) | 26.0 (18.5 33.6) |
| Female | 28.0 (27.1 28.9) | 27.0 (25.3 28.7) | 26.0 (23.6 28.4) | 25.0 (22.0 28.1) | 24.1 (20.4 27.7) | 23.2 (19.0 27.3) | 22.2 (17.5 26.9) | 21.3 (16.1 26.4) | 20.4 (14.8 25.9) | 19.4 (13.5 25.4) |
| YLDs |  |  |  |  |  |  |  |  |  |  |
| Both | 13.7 (13.7 13.8) | 13.9 (13.6 14.2) | 14.1 (13.6 14.5) | 14.2 (13.5 15.0) | 14.4 (13.4 15.4) | 14.6 (13.2 15.9) | 14.7 (13.1 16.4) | 14.9 (12.9 16.9) | 15.0 (12.6 17.4) | 15.2 (12.4 18.0) |
| Male | 16.1 (16.0 16.2) | 16.1 (15.8 16.4) | 16.1 (15.6 16.6) | 16.1 (15.4 16.9) | 16.2 (15.2 17.1) | 16.2 (14.9 17.4) | 16.2 (14.6 17.8) | 16.2 (14.3 18.1) | 16.2 (14.0 18.5) | 16.3 (13.7 18.8) |
| Female | 10.9 (10.9 11.0) | 11.0 (10.8 11.2) | 11.1 (10.8 11.5) | 11.2 (10.7 11.8) | 11.3 (10.6 12.1) | 11.4 (10.4 12.4) | 11.5 (10.3 12.7) | 11.6 (10.1 13.1) | 11.7 (9.9 13.5) | 11.8 (9.7 13.9) |
| YLLs |  |  |  |  |  |  |  |  |  |  |
| Both | 20.7 (19.8 21.6) | 19.3 (17.5 21.2) | 18.0 (15.2 20.8) | 16.7 (13.0 20.4) | 15.3 (10.8 19.9) | 14.0 (8.7 19.4) | 12.7 (6.6 18.8) | 11.4 (4.6 18.2) | 10.1 (2.6 17.6) | 8.8 (0.6 16.9) |
| Male | 23.8 (22.7 24.9) | 22.2 (20.0 24.3) | 20.5 (17.4 23.7) | 18.9 (14.7 23.1) | 17.3 (12.2 22.4) | 15.7 (9.6 21.7) | 14.1 (7.2 20.9) | 12.4 (4.8 20.1) | 10.8 (2.4 19.2) | 9.2 (0.1 18.2) |
| Female | 17.1 (16.2 18.1) | 16.1 (14.3 17.9) | 15.0 (12.4 17.7) | 14.0 (10.6 17.5) | 13.0 (8.9 17.2) | 12.1 (7.2 16.9) | 11.1 (5.6 16.6) | 10.1 (4.0 16.2) | 9.2 (2.5 15.8) | 8.2 (1.0 15.4) |
